1 **Characteristics of a SAR11 strain grown in batch and continuous culture**

2

3 Scott R. Grant<sup>a</sup>, Matthew J. Church<sup>b</sup>, Sara Ferrón<sup>a,c</sup>, Edward A. Laws<sup>d</sup>, and Michael S. Rappé<sup>e</sup>#

4

5 <sup>a</sup>Department of Oceanography, School of Ocean and Earth Science and Technology, University  
6 of Hawaii at Manoa, Honolulu, Hawai'i, USA

7 <sup>b</sup>Flathead Lake Biological Station, University of Montana, Polson, Montana, USA

8 <sup>c</sup>Daniel K. Inouye Center for Microbial Oceanography: Research and Education, School of  
9 Ocean and Earth Science and Technology, University of Hawaii at Manoa, Honolulu, Hawai'i,  
10 USA

11 <sup>d</sup>Department of Environmental Sciences, College of the Coast and Environment, Louisiana State  
12 University, Baton Rouge, Louisiana, USA

13 <sup>e</sup>Hawaii Institute of Marine Biology, School of Ocean and Earth Science and Technology,  
14 University of Hawaii at Manoa, Kaneohe, Hawai'i, USA

15

16 Running Title: Growth characteristics of SAR11

17

18 #Address correspondence to Michael Rappé, [rappe@hawaii.edu](mailto:rappel@hawaii.edu).

19

20 Summary word count: 250 (Abstract), 167 (Importance)

21 Text word count:

22

## 23 **Abstract**

24           In this study, a strain of SAR11 subgroup IIIa (termed HIMB114) isolated from the  
25 tropical Pacific Ocean was grown in seawater-based batch and continuous culture in order to  
26 quantify cellular features and metabolism relevant to SAR11 ecology. We report the first direct  
27 measurements of cellular elemental quotas for nitrogen (N) and phosphorus (P) for SAR11:  $1.4 \pm$   
28  $0.9$  fg N and  $0.44 \pm 0.01$  fg P, respectively, that were consistent with the small size of HIMB114  
29 cells (average volume of  $0.09 \mu\text{m}^3$ ). However, the mean carbon (C) cellular quota of  $50 \pm 47$  fg  
30 C was anomalously high, but variable. Rates of phosphate ( $\text{PO}_4^{3-}$ ) uptake measured from both  
31 batch and continuous cultures were exceptionally slow: in chemostats growing at  $0.3 \text{ d}^{-1}$ ,  
32 HIMB114 took up  $1.1 \pm 0.3$  amol P  $\text{cell}^{-1} \text{ d}^{-1}$ , suggesting that <30% of the cellular P requirement  
33 of HIMB114 was met by  $\text{PO}_4^{3-}$  assimilation. The mean rate of leucine incorporation, a measure  
34 of bacterial production, during late log phase growth of batch HIMB114 cultures was  $0.042 \pm$   
35  $0.02$  amol Leu  $\text{cell}^{-1} \text{ h}^{-1}$ . While only weakly correlated with changes in specific growth rates, the  
36 onset of stationary phase resulted in decreases in cell-specific leucine incorporation that were  
37 proportional to changes in growth rate. Rates of cellular production, respiratory oxygen  
38 consumption, and changes in total organic C concentrations constrained cellular growth  
39 efficiencies to  $13 \pm 4\%$ . Hence, despite the small, streamlined genome and diminutively sized  
40 cells, SAR11 strain HIMB114 appears to grow at efficiencies similar to naturally occurring  
41 bacterioplankton communities.

42

## 43 **Importance**

44 While SAR11 bacteria contribute a significant fraction to the total picoplankton biomass in the  
45 ocean and likely are major players in organic C and nutrient cycling, the cellular characteristics

46 and metabolic features of most lineages have either been only hypothesized from genomes or  
47 otherwise not measured in controlled laboratory experimentation. The dearth of data on even the  
48 most basic characteristics for what is arguably the most abundant heterotroph in seawater has  
49 limited the specific consideration of SAR11 in ocean ecosystem modeling efforts. In this study,  
50 we provide measures of cellular P, N, C, aerobic respiration and bacterial production for a  
51 SAR11 strain growing in natural seawater media that can be used to directly relate these features  
52 of SAR11 to biogeochemical cycling in the oceans. Through the development of a chemostat  
53 system to measure nutrient uptake during steady-state growth, we have also documented  
54 inorganic P uptake rates that allude to the importance of organic phosphorous to meet cellular P  
55 demands, even in the presence of non-limiting  $\text{PO}_4^{3-}$  concentrations.

56

57

## 58 **Introduction**

59           The SAR11 bacterial lineage is a genetically diverse clade of aquatic, free-living cells  
60 with compact, streamlined genomes, found broadly distributed throughout the oceans (1). They  
61 are also among the smallest free-living cells from the ocean that have isolated strains available to  
62 study in the laboratory (2). Typical biovolumes for healthy SAR11 cells range from 0.015 to  
63 0.058  $\mu\text{m}^3$  (3), and possess a crescent-shaped morphology (2-5). Small cells are thought to have  
64 an advantage in oligotrophic environments where they should be able to out-compete larger  
65 osmotrophs for nutrients relative to their requirements for growth, ascribed to the importance of  
66 having a large surface area to volume ratio (6).

67           Culture studies examining the physiology of SAR11 strains have provided a number of  
68 unexpected discoveries and valuable insights into the metabolism of the clade (1). Directed by  
69 clues generated from genome analysis indicating that a number of metabolic pathways common  
70 to chemoheterotrophs were incomplete or missing, subsequent culture studies led to evidence of  
71 unusual growth requirements for SAR11 (e.g. 5, 7-12). For example, evidence of an incomplete  
72 assimilatory sulfate reduction pathway led Tripp and colleagues to the discovery that SAR11  
73 strain HTCC1062 requires a source of reduced sulfur for growth, which could be satisfied by  
74 methionine or dimethylsulphoniopropionate (7). Further investigations showed that SAR11 had a  
75 variant of the standard glycolysis pathways, with nonconserved ability of SAR11 strains to  
76 oxidize simple sugars, while low molecular weight organic acids were shown to be important C  
77 sources for many SAR11 strains (9). In subsequent experiments, Carini and colleagues were able  
78 to successfully grow SAR11 strain HTCC1062 on a novel defined artificial seawater medium  
79 with pyruvate serving as a source of C, methionine as a sole sulfur source, glycine as a necessary  
80 amino acid, along with standard base salts, inorganic macro-nutrients  $\text{PO}_4^{3-}$  and ammonium

81 (NH<sub>4</sub><sup>+</sup>), and micro-nutrient trace metal and vitamin additions (5). Laboratory experiments with  
82 isolated SAR11 strains have primarily focused on representatives from the SAR11 subclade Ia,  
83 which includes the majority of isolates including ‘*Candidatus Pelagibacter ubique*’ strain  
84 HTCC1062 (2), with little information from representatives of other SAR11 subclades.

85         Recent studies suggest that the type of P available, whether present as PO<sub>4</sub><sup>3-</sup> or dissolved  
86 organic P (DOP), is an important control on microbial niche partitioning in the sea (13, 14). The  
87 Global Ocean Sampling (GOS) expedition, an extensive metagenomic survey of marine surface  
88 waters, revealed that genes from the high-affinity PO<sub>4</sub><sup>3-</sup> transport system (*pstS*) most closely  
89 matching sequenced *Prochlorococcus* and SAR11 genes, were among the most highly recruited  
90 annotated genes (15). Moreover, during the GOS expedition, representation of *pstS* genes were  
91 the single most significant difference between the tropical Atlantic and equatorial Pacific  
92 samples, varying by a factor of more than seven in relative abundance (15). Studies of culture  
93 representatives of *Prochlorococcus*, the most abundant oxygenic photoautotroph in the ocean,  
94 confirm that there appear to be substantial differences in the presence, topology, and regulation  
95 of genes thought to be involved in P acquisition between strains of *Prochlorococcus* (16), with  
96 different strains able to metabolize inorganic vs. labile organic P compounds. Finally, in a gene  
97 content comparison of whole population genomes of *Prochlorococcus* and SAR11 between  
98 microbial communities inhabiting the well-known stations of the Hawaii Ocean Time-series  
99 (HOT) program (North Pacific) and the Bermuda Atlantic Time-series Study (BATS) (North  
100 Atlantic), Coleman and Chisholm found that of the 1.8% of gene clusters which had significant  
101 abundance differences between the Atlantic and Pacific populations, 87% of those genes were  
102 involved in PO<sub>4</sub><sup>3-</sup> or phosphonate metabolism (17).

103 Motivated by the intriguing evidence that P acquisition strategies are under strong  
104 selection pressure and may be a potential dimension over which SAR11 lineages are  
105 differentiated, this study sought to investigate the uptake capability of the SAR11 subclade IIIa  
106 isolate HIMB114 for  $\text{PO}_4^{3-}$ . Because SAR11 bacteria characteristically dominate marine  
107 planktonic microbial communities, it is also a notable deficiency that typical parameters needed  
108 to model their growth and response under variable environmental conditions are not yet  
109 available. Thus, this study also sought to measure a number of basic cellular properties such as  
110 elemental composition, and physiological rate measurements including cellular production,  
111 respiration, and growth efficiency. In the process, a continuous culture of an axenic SAR11  
112 strain was developed for the first time, enabling assessment of many of these physiological  
113 features under defined growth conditions.

114

## 115 **Results**

116 **Culture growth and cell size.** In natural seawater-based growth media, strain HIMB114 reached  
117 a maximum specific growth rate of  $1.2 \text{ d}^{-1}$  and yielded  $5\text{-}8 \times 10^5 \text{ cells mL}^{-1}$  (Fig. S1). HIMB114  
118 cells were observed to have a crescent-shaped morphology that was consistent with previous  
119 microscopic observations of SAR11 (Fig. 1). Elongated cells of HIMB114 were observed that  
120 consisted of spirillum morphologies of two to four “regular” (i.e. recently divided) single-cell  
121 lengths. These longer cell morphologies were a small fraction (few percent) of the cells during  
122 exponential growth phase, but became an increasing percentage (up to 30%) of cells as the  
123 culture entered into stationary phase. Distributions of cell size parameters for length, width, and  
124 biovolume were all non-normal and fit as log-normal distributions to calculate the most frequent  
125 and mean size parameter values (Fig. S2). The mean of the distribution was used when  
126 normalizing any quantities to a cell size parameter (length  $1.07 \text{ }\mu\text{m}$ ; width  $0.32 \text{ }\mu\text{m}$ ; volume  $0.09$   
127  $\mu\text{m}^3$ ).

128  
129 **Cellular elemental quotas.** The P cell quota for HIMB114 measured for batch cultures in early  
130 stationary phase was  $14.2 \pm 0.4 \text{ amol P cell}^{-1}$  (mean  $\pm$  s.d.;  $n=6$ ) or  $0.44 \text{ fg P cell}^{-1}$ , with a mean  
131 precision of 2% for triplicate 4–5 L culture volumes. The particulate P controls made from spent  
132 media were 5% of that measured for the cellular biomass collected on their corresponding  $0.2$   
133  $\mu\text{m}$  pore-sized membrane filter. Hence, the modified method for measuring particulate P on  $47$   
134 mm diameter PC membranes described in the Materials and Methods appeared to work well.

135 Filtered media blanks for particulate C and N were high relative to the sample signal, and  
136 increased with the volume of media filtered (Fig. S3). Because complete saturation was not  
137 conclusive even at a media blank volume of 10 L, rectangular hyperbolic saturation functions

138 were fit by non-linear least squares regression to the blank C and N data versus filtered media  
139 volume in order to extrapolate the associated blank values for the 30 L of total volume filtered  
140 (Fig. S3). After normalizing to the total number of cells captured on each filter, the mean C cell  
141 quota was  $50 \pm 47$  fg C cell<sup>-1</sup> (mean  $\pm$  s.d.; n=3) or 4.2 fmol C cell<sup>-1</sup>, and the mean N cell quota  
142 was  $1.4 \pm 0.9$  fg N cell<sup>-1</sup> (mean  $\pm$  s.d.; n=3) or 0.1 fmol N cell<sup>-1</sup>.

143  
144 **PO<sub>4</sub><sup>3-</sup> uptake in batch and continuous culture.** Rates of PO<sub>4</sub><sup>3-</sup> uptake measured by <sup>33</sup>P-  
145 radiotracer for a continuous culture of HIMB114 were extremely slow (Fig. 2A). Of the five  
146 PO<sub>4</sub><sup>3-</sup> uptake rate time course measurements performed from the chemostat cultures over 4 to 6 h  
147 at ambient (100 nmol L<sup>-1</sup>) phosphate concentrations, the mean specific uptake rate was  $0.007 \pm$   
148  $0.0025$  d<sup>-1</sup> (mean  $\pm$  s.d.; n=5), with a mean coefficient of determination of uptake vs. time of  
149 0.97 (Fig. 2A). This corresponds to a mean PO<sub>4</sub><sup>3-</sup> turnover time (T<sub>P</sub>) of  $160 \pm 50$  days (mean  $\pm$   
150 s.d.; n=5), or a bulk PO<sub>4</sub><sup>3-</sup> uptake rate of  $0.68$  nmol L<sup>-1</sup> P d<sup>-1</sup>. In cell specific units, HIMB114  
151 took up  $1.1 \pm 0.3$  amol P cell<sup>-1</sup> d<sup>-1</sup> (mean  $\pm$  s.d.; n=5), or less than 10% of the cellular P quota  
152 per day, despite growing at a rate of  $0.3$  d<sup>-1</sup>. Phosphate uptake kinetics measured for the  
153 chemostat culture averaged  $0.4 \pm 0.09$  nmol L<sup>-1</sup> P d<sup>-1</sup> (mean  $\pm$  s.d.; n=9) across all PO<sub>4</sub><sup>3-</sup>  
154 additions, showing no significant correlation between uptake rate and PO<sub>4</sub><sup>3-</sup> concentration within  
155 the error of the measurements (Fig. 2B). This observation most likely reflects the fact that the  
156 culture was not P-limited; an interpretation confirmed by the fact that PO<sub>4</sub><sup>3-</sup> additions to batch  
157 cultures entering stationary phase had no effect on growth (not shown).

158 For HIMB114 grown under batch conditions, PO<sub>4</sub><sup>3-</sup> uptake rates were also extremely low  
159 (Fig. 2A). Measured during late exponential phase for a culture growing at  $1.02$  d<sup>-1</sup>, the highest  
160 specific uptake rate measured was  $4 \times 10^{-5}$  d<sup>-1</sup>, equivalent to a turnover time of the PO<sub>4</sub><sup>3-</sup> pool of



161 70 years (ranging 50 to 100 years). In bulk units, the maximum  $\text{PO}_4^{3-}$  uptake rate for the batch  
162 cultures in late exponential growth was  $6 \text{ pmol P L}^{-1} \text{ d}^{-1}$ . To confirm that the cells were actively  
163 growing, leucine incorporation measurements were conducted at the same time as the  $\text{PO}_4^{3-}$   
164 uptake measurements (described in greater detail below). The resulting production rate was  $37 \pm$   
165  $2.6 \text{ nmol C L}^{-1} \text{ d}^{-1}$  (mean  $\pm$  s.d.;  $n=4$ ) that, when converted to P units using a 50:1 C:P molar  
166 ratio, yields a P requirement of  $0.7 \text{ nmol P L}^{-1} \text{ d}^{-1}$ . Given that the measured bulk  $\text{PO}_4^{3-}$  uptake  
167 rate was  $6 \text{ pmol P L}^{-1} \text{ d}^{-1}$  (or  $\sim 1\%$  of the requirement), such results suggest  $\text{PO}_4^{3-}$  was not the  
168 primary source of P for HIMB114 growing on natural seawater based media containing 100-150  
169  $\text{nmol PO}_4 \text{ L}^{-1}$ .

170

171 **Chemostat steady-state theory.** The theoretical expectations for  $\text{PO}_4^{3-}$  uptake rate and turnover  
172 time measurements for the chemostat system are fairly well constrained, much better than for  
173 batch culture growth, because steady state theory may be applied (18). The cell specific uptake  
174 rate is the product of the specific growth rate ( $\mu$ ) with the cellular P quota ( $Q_P$ ):

$$175 \quad V = \mu \cdot Q_P$$

176 The growth rate is experimentally set by the chemostat dilution rate, here  $0.3 \text{ d}^{-1}$ . The cellular P-  
177 quota (measured at  $14.2 \text{ amol P cell}^{-1}$ ) yielded a theoretical uptake rate of  $4.3 \pm 0.5 \text{ amol P cell}^{-1}$   
178  $\text{d}^{-1}$ . In comparison, the highest measured uptake rate was  $1.3 \pm 0.2 \text{ amol P cell}^{-1} \text{ d}^{-1}$ , or about  
179 30% of the theoretical value. This was the highest uptake rate measured for the culture and,  
180 consistent with results from the batch culture, indicated that HIMB114 growing under steady-  
181 state conditions with  $\text{PO}_4^{3-}$  concentrations at  $100 \text{ nmol L}^{-1}$  was likely not using  $\text{PO}_4^{3-}$  as a sole or  
182 primary P source for growth, and was instead meeting a large fraction of its P requirements from  
183 assimilation of organic P.

184

185 **Bacterial production.** Bacterial production measurements were conducted on four consecutive  
186 days spanning the end of log phase into the early transition to stationary phase from the five  
187 batch culture experiments (Fig. 3A, Fig. S4). The mean per cell rate of leucine incorporation  
188 across all cultures grown on K-Bay standard medium was  $0.042 \pm 0.02$  amol Leu cell<sup>-1</sup> h<sup>-1</sup>  
189 (mean  $\pm$  s.d.; n=20), resulting in average cell-specific rates of production of  $0.13 \pm 0.07$  fmol C  
190 cell<sup>-1</sup> d<sup>-1</sup> (mean  $\pm$  s.d.; n=20) (Table 1).

191 Bacterial production measurements for HIMB114 were relatively uniform, with a  
192 coefficient of variation of 40% across the 10 different cultures and 20 independent measurements  
193 grown on natural K-Bay seawater medium, despite being measured across a range of growth  
194 rates throughout exponential and early stationary phases of batch growth (linear correlation  
195 coefficient of 0.58, p-value 0.009) (Fig. 3B). However, in individual batch culture experiments, a  
196 decline in rate of cell division associated with entry into stationary phase was associated with a  
197 concomitant decline in production measured by leucine incorporation (Fig. 3A, Fig. S4), and the  
198 slope of the fit line for the plot of bacterial production vs. specific growth rate was positive ( $0.8$   
199  $\pm 0.3$  (95% C.I.)  $\times 10^6$  molecules Leu cell<sup>-1</sup>).

200

201 **Respiration.** Rates of respiration were determined from three incubation experiments  
202 subsampled from the batch cultures (Table 2). Respiration was derived from linear regression fits  
203 to time course experiments in which the concentration of O<sub>2</sub> was measured over two-day  
204 incubation periods (Figs. 3A and 4). Although extensive measures were taken to thoroughly acid  
205 clean and rinse the glass bottles, HIMB114 cells were only able to grow in the glass incubation  
206 bottles for a period of about two days and the consumption of O<sub>2</sub> was only linear over this initial

207 ~two-day period (Fig. 4). Respiration rates showed high reproducibility over the three incubation  
208 experiments [ $0.37 \pm 0.06 \mu\text{mol O}_2 \text{ L}^{-1} \text{ d}^{-1}$  (mean  $\pm$  s.d., n=3)] (Table 2) for cultures beginning  
209 with cell densities near  $2 \times 10^5 \text{ mL}^{-1}$  at the start of the incubations, and increasing on average 2.5  
210 times over the two-day incubation period to about  $5 \times 10^5 \text{ mL}^{-1}$ . Cell-normalized rates of  
211 respiration averaged  $\sim 1 \text{ fmol O}_2 \text{ cell}^{-1} \text{ d}^{-1}$  when cultures were transitioning from exponential  
212 growth to stationary phase at a specific growth rate of approximately  $0.5 \text{ d}^{-1}$ .

213 Rates of respiration were also derived based on changes in total organic C (TOC) within  
214 HIMB114 cultures over several days, measured at the start and end of the incubations of six  
215 replicate 10 L batch cultures of HIMB114 (Fig. S1). The initial TOC concentration in the media  
216 was  $83 \pm 2 \mu\text{mol C L}^{-1}$  (mean  $\pm$  s.d., n=6), while the final TOC concentration sampled 9 days  
217 later was  $79 \pm 3 \mu\text{mol C L}^{-1}$  (mean  $\pm$  s.d., n=6), resulting in a mean drawdown of TOC over the  
218 9-day incubation of  $4 \pm 4 \mu\text{mol C L}^{-1}$  (mean  $\pm$  s.d., n=6). This is equivalent to approximately 5%  
219 of initial TOC. The resulting average rate of respiration was  $0.44 \pm 0.44 \mu\text{mol C L}^{-1} \text{ d}^{-1}$ . This  
220 rate is very similar to the mean rate of  $\text{O}_2$  consumption (based on the two day incubation period),  
221 assuming a respiratory quotient of 1 mol C: mol  $\text{O}_2$ , of  $0.37 \pm 0.06 \mu\text{mol C L}^{-1} \text{ d}^{-1}$  (mean  $\pm$  s.d.,  
222 n=3).

223  
224 **Bacterial growth efficiency.** By combining rates of bacterial production with the measured rates  
225 of respiration we were able to estimate bacterial growth efficiency (BGE) for the HIMB114  
226 batch cultures. BGE is defined as the ratio of the C production rate to the total C demand, which  
227 is the sum of production and respiration:

$$BGE = \frac{BP}{BP + BR}$$

228 Combining these rate measurements resulted in a mean BGE of 13% with a 95% confidence  
229 interval of 10 – 21% estimated by a Monte Carlo simulation study (Table 2).

230

## 231 **Discussion**

232 Steady state chemostat growth provides an ideal system to investigate the physiology and  
233 cellular properties of model microorganisms. The chemostat system allows the investigation of  
234 cellular physiology under controlled growth rate conditions, something unachievable using batch  
235 cultures. In this case, the steady state growth achieved through the chemostat allowed us to  
236 simultaneously calculate the theoretical P demand as well as determine the actual  $\text{PO}_4^{3-}$  uptake  
237 rate at a set rate of growth. Despite the inability to grow strain HIMB114 under P-limiting  
238 conditions, these experiments suggest that this isolate relies heavily on sources of P other than  
239  $\text{PO}_4^{3-}$  when grown on a natural seawater minimal medium. This finding is particularly intriguing  
240 considering that HIMB114 has a complete high-affinity  $\text{PO}_4^{3-}$  transport system (19), and so  
241 should have the full capacity to transport  $\text{PO}_4^{3-}$  under dilute conditions. While inorganic  $\text{PO}_4^{3-}$  is  
242 generally considered the preferred P source for marine bacteria (14), oligotrophic marine  
243 environments such as Kaneohe Bay in the tropical Pacific Ocean where strain HIMB114 was  
244 isolated typically have DOP concentrations an order of magnitude above inorganic phosphate  
245 concentrations (20). Thus, the ability to utilize components of the DOP pool to attain P may be  
246 competitively advantageous. In both batch and chemostat culture conditions, HIMB114 appeared  
247 to utilize an undetermined component of the DOP pool to meet its P growth demands, even when  
248  $\text{PO}_4^{3-}$  was amended to the media. Which component(s) of the DOP pool were utilized remains to  
249 be determined. One potential class of DOP compounds receiving recent attention are  
250 phosphonates, which are organic phosphonic acid derivatives containing a C-P bond and which

251 make up 25% of the high molecular weight DOM pool (21). Evidence of the widespread  
252 distribution of genes for the transport and metabolism of phosphonates has been reported in  
253 marine microorganisms (22-24) including SAR11 (Table S1) (17, 19), and there is precedent for  
254 the  $\text{PO}_4^{3-}$ -independent utilization of phosphonates in marine systems (25). In laboratory  
255 experiments with a defined growth medium, SAR11 subgroup Ia strain HTCC7211 was shown to  
256 utilize phosphonates as a source of P for growth (12). While the genome of strain HIMB114  
257 encodes for a complete phosphonate transport system similar to that of HTCC7211, it encodes a  
258 unique and sparse complement of genes for phosphonate metabolism (Table S1).

259 At  $14.2 \text{ amol P cell}^{-1}$ , the measured P cell quota for HIMB114 is close to that determined  
260 for SAR11 subgroup Ia strain HTCC7211 ( $10.9 \text{ amol P cell}^{-1}$ ) grown on a P-limiting, defined  
261 medium (12). Using transmission electron microscopy coupled with X-ray microanalysis,  
262 Gundersen and colleagues found an empirical biovolume ( $V$ ) power law relationship for cell P  
263 quotas of  $126V^{0.937} \text{ amol P cell}^{-1}$ , measured for 84 bacterial cells with mean cell volume  $0.08$   
264  $\mu\text{m}^3$  (range  $0.001$  to  $2.0 \mu\text{m}^3$ ) (26). Using this power law for HIMB114 cells suggests a cellular  
265 quota of  $13 \text{ amol P cell}^{-1}$ , similar to the value measured in our study. At  $1.237 \text{ Mbp}$  and  $2 \text{ P-}$   
266  $\text{atoms per base pair}$ , the small genome of HIMB114 yields a P content of  $4.1 \text{ amol P cell}^{-1}$ . This  
267 calculation suggests DNA alone accounts for approximately 29% of the cellular P-quota, a  
268 finding roughly 2 to 3 times the 10-15% cellular P traditionally considered accounted for by  
269 DNA in a bacterial cell (27). Another significant pool for P is likely phospholipids, which have  
270 previously been measured to contain  $2.5 \text{ amol P cell}^{-1}$  for strain HIMB114 grown in  $\text{PO}_4^{3-}$   
271 replete seawater media (28). Thus, nearly half of the P-quota of the cell can be accounted for by  
272 only two macro-molecular components: DNA and phospholipids. While not quantified in  
273 HIMB114 or other SAR11 cultures, RNA is typically the dominant contributing molecular pool

274 to cellular P; typical total RNA to DNA mass ratios are infrequently below 2:1 (mass RNA: mass  
275 DNA), even for slowly growing bacteria (29). At a lower limit of 1:1 RNA:DNA, an additional  
276 4.1 amol P cell<sup>-1</sup> can be accounted for by inclusion of cellular RNA pools. Hence, HIMB114  
277 appears to have a similar cellular P concentration (0.16 M P) compared to other marine bacteria  
278 (0.1 to 0.2 M P) (30), and it would be difficult to further reduce this P demand unless these cells  
279 were able to substitute P-free lipids for phospholipids as has been demonstrated for SAR11  
280 subgroup Ia strain HTCC7211 (31). However, no genetic capacity for phospholipid substitution  
281 analogous to that found in the genome of strain HTCC7211 is apparent in the HIMB114 genome.

282 At 0.05  $\mu\text{m}^3$ , the peak of the distribution for cell volume of strain HIMB114 was  
283 consistent with the recently reported range of 0.015 to 0.058  $\mu\text{m}^3$  for SAR11 subclade Ia isolates  
284 HTCC1062 and HTCC7211 (3). However, the mean value of the cell volume distribution (0.09  
285  $\mu\text{m}^3$ ) for HIMB114 was larger than anticipated, which can be at least partially attributed to  
286 elongated and chains of cells that increase in frequency as HIMB114 enters into stationary phase  
287 (Fig. 1). This phenomenon has been observed previously for SAR11 subgroup Ia strain  
288 HTCC1062 (5) and thus may be a broadly distributed, growth stage-dependent feature of SAR11  
289 that has the potential to confound models and other measurements that rely on an average cell  
290 size or that are normalized per cell. For example, this phenomenon may contribute to the  
291 variability observed between bacterial production measured by leucine incorporation and cellular  
292 growth rate during the transition to stationary phase (Fig. 3).

293 The genome and the membrane envelope are two essential components of a cell that  
294 cannot be continuously scaled down with cell size (6), and hence represent increasing fractions  
295 of total cell volume, or mass, for cell volumes below 0.05  $\mu\text{m}^3$  (Fig. S5). This constrains the  
296 lower limit for a bacterial cell volume to about 0.004  $\mu\text{m}^3$ . We therefore propose a potential

297 trade-off between nutrient acquisition strategies and P growth requirements for small cells. In  
298 oligotrophic, nutrient-limited environments, a high surface area to volume ratio should increase a  
299 cells ability to compete for dilute nutrients, giving small cells a distinct competitive advantage.  
300 Yet, there is an opposing force balancing this trend toward smaller cell size, namely an  
301 increasing P requirement relative to cell mass necessary to maintain a given growth rate. This  
302 trade-off is reflected in the importance of P-sparing strategies employed by oligotrophic  
303 picocyanobacteria such as *Prochlorococcus* (32), and the noted prevalence and diversity of P  
304 acquisition and metabolism related genes found to be important across large ocean ecosystem  
305 regimes (15, 17). In addition to membrane lipid renovation (31), strategies employed by very  
306 small, diverse, and successful bacteria of the SAR11 clade to sustain cellular P demands and  
307 otherwise maintain sufficient net growth rates to numerically dominate surface marine waters  
308 will no doubt continue to provide interesting discoveries.

309         The exceedingly high C to N stoichiometry of near  $40 \pm 14:1$  (mol C: mol N) is well  
310 outside normally reported ranges for bulk marine particulate organic matter or C:N ratios of flow  
311 cytometrically sorted natural planktonic populations (max 24.4, mean  $9.4 \pm 3.6$ ,  $n=277$ ) (33).  
312 Moreover, the resulting C: N: P cellular stoichiometry for HIMB114 would approach 300:7:1  
313 (mol C : mol N : mol P), a finding inconsistent with previous estimates for members of the  
314 SAR11 clade. Such results are primarily driven by the exceedingly large C cell quota measured  
315 for HIMB114 in this study ( $50 \pm 47$  fg). The N cell quota for HIMB114 ( $1.4 \pm 0.9$  fg) is slightly  
316 lower than the minimum N cell quota of 1.6 fg N for natural bacteria reported by Fagerbakke,  
317 Heldal & Norland, (30). Using the biovolume power law regression from Gundersen et al., (26)  
318 to derive cellular N quotas results in 2.4 fg N for a cell volume of  $0.09 \mu\text{m}^3$  (mean volume  
319 measured in the current study); the same relationship yields a cellular C quota of  $\sim 13$  fg C. Tripp

320 and colleagues previously estimated that SAR11 subgroup Ia strain HTCC1062 contained 5.8 fg  
321 C cell<sup>-1</sup> for cells of biovolume 0.035 μm<sup>-3</sup> (7), which scales to 14.9 fg C cell<sup>-1</sup> for a cellular  
322 volume of 0.09 μm<sup>3</sup>. Similarly, Cermak and colleagues estimated that cellular C quotas varied  
323 between 12 to 16 fg for SAR11 strains HTCC1062 and HTCC7211 (34), which would scale to  
324 24 to 48 fg C for HIMB114 when accounting for differences in cell volume. Such comparisons  
325 suggest the measurements of cellular C from the current study are overestimates. Although it  
326 remains unclear what factors may have contributed to these results, such findings may reflect the  
327 poor filtration retention efficiency of the filters utilized for these measurements. Regardless,  
328 accurate quantification of cellular C content of SAR11 cells remains imperative for future  
329 research efforts.

330         Although there are no published bacterial production measurements for any axenic  
331 SAR11 cultures, we can compare our values to measurements from planktonic marine  
332 ecosystems where SAR11 often dominate. The observed mean leucine incorporation rate from  
333 this study ( $4.2 \times 10^{-8}$  pmol Leu cell<sup>-1</sup> h<sup>-1</sup>) is very close to that of the natural community mean  
334 dark leucine incorporation rates, normalized to non-pigmented cell counts, for station ALOHA in  
335 the North Pacific subtropical gyre of  $5 \times 10^{-8}$  pmol Leu cell<sup>-1</sup> h<sup>-1</sup> (35), and falls at the lower end  
336 of the range measured for natural surface seawater communities along a transect off the Oregon  
337 coast ( $0.39\text{--}4.7 \times 10^{-7}$  pmol Leu cell<sup>-1</sup> h<sup>-1</sup>) (36). Malmstrom and colleagues measured the  
338 contribution of naturally occurring SAR11 populations to bulk <sup>3</sup>H-leucine incorporation rates  
339 using a combination of microautoradiography and fluorescence *in situ* hybridization (Micro-  
340 FISH) in the Northwest Atlantic Ocean (37). These authors reported that SAR11 accounted for a  
341 large fraction (50%) of the bulk leucine incorporation rates in surface waters, where they  
342 represented 25–35% ( $2\text{--}4 \times 10^8$  cells L<sup>-1</sup>) of the picoplankton population. The resulting SAR11-



343 specific C production rates were estimated to be from  $0.5 \mu\text{g C L}^{-1} \text{d}^{-1}$  for an open-ocean Gulf  
344 Stream site, increasing to about  $3 \mu\text{g C L}^{-1} \text{d}^{-1}$  for a coastal location. del Giorgio and Cole  
345 compiled published marine ecosystem bacterial production measurements and reported global  
346 mean bacterial production rates of  $2.41 \pm 0.33 \mu\text{g C L}^{-1} \text{d}^{-1}$  for the coastal ocean to  $0.37 \pm 0.054$   
347  $\mu\text{g C L}^{-1} \text{d}^{-1}$  for the open ocean (38). In the current study, the bulk C production rate measured  
348 for HIMB114 cultures was  $0.6 \pm 0.2 \mu\text{g C L}^{-1} \text{d}^{-1}$ , similar to those estimated by Malmstrom and  
349 colleagues (37) and typical of open-ocean, oligotrophic values reported by del Giorgio and Cole  
350 (38).

351 Leucine incorporation rates are used as a standard proxy for biomass production under  
352 the assumption that protein is a major constituent of cell biomass, and that leucine represents a  
353 relatively stable proportion of bacterial protein (39). This allows consistent comparisons of  
354 protein synthesis rates, and thus biomass production, across the wide spectrum of bacterial  
355 species capable of taking up leucine. It was somewhat surprising then to find that bacterial  
356 production measured by leucine incorporation varied little across a range of growth rates for  
357 HIMB114, with only a weak correlation between the two measures. While this could be due to  
358 the low precision (typically 15%) for both cell counts and leucine incorporation measures, it is  
359 also possible that protein production rates and cell division rates are uncoupled at short time  
360 scales under non-linear batch growth.

361 We also measured  $\text{O}_2$ -based rates of respiration, with rates averaging  $\sim 0.4 \mu\text{mol O}_2 \text{L}^{-1}$   
362  $\text{d}^{-1}$ . These low rates of respiration were highly reproducible, with a coefficient of variation of  
363 16% between replicate incubations. Moreover, the measured  $\text{O}_2$ -based respiration measurements  
364 agreed with the measured drawdown of organic carbon over the course of the incubations, which  
365 together with measured rates of bacterial production yielded estimates of BGE near 13%. Such

366 results suggest HIMB114 grows at similar efficiencies as other marine heterotrophic bacteria,  
367 despite features such as an exceptionally small, streamlined genome that might be expected to  
368 enable more efficient growth.

369 Steindler and colleagues have published the only other dissolved oxygen measurements  
370 from a SAR11 culture, wherein SAR11 subgroup Ia strain HTCC1062 cultures were measured  
371 using an oxygen optode (4). Although rates of respiration were not explicitly calculated in that  
372 study, over the initial 69 h period of incubation concentrations of O<sub>2</sub> declined by approximately  
373 100 μmol O<sub>2</sub> L<sup>-1</sup>, equivalent to a rate of O<sub>2</sub> consumption of ~35 μmol O<sub>2</sub> L<sup>-1</sup> d<sup>-1</sup>. Cell densities  
374 in the experiments of Steindler and colleagues were three orders of magnitude higher than the  
375 densities of our experiment; when normalized to cell density, the rate of respiration for  
376 HTCC1062 was approximately 0.35 fmol O<sub>2</sub> cell<sup>-1</sup> d<sup>-1</sup>, approximately one third of the rate  
377 observed for strain HIMB114.

378

## 379 **Conclusions**

380 Though we were unable to create a state of P-limited growth or to determine what may be  
381 limiting HIMB114 when grown on a minimal seawater medium, we were able to rule out many  
382 of the common C, sulfur, and specific amino acid growth substrates that have been shown to  
383 enhance growth for other SAR11 cultures and permit their growth in a defined, artificial  
384 seawater growth medium (5, 7, 8, 11, 40). While this implies caution in extrapolating the results  
385 of culture-based studies from specific SAR11 isolates to the SAR11 lineage as a whole, it also  
386 suggests that exciting metabolic features that distinguish populations, ecotypes, and major  
387 SAR11 sub-lineages await characterization. One such feature, uncovered by using a continuous  
388 culture of HIMB114, is the apparent inability of this strain to fulfill its cellular P-demand

389 through the uptake of  $\text{PO}_4^{3-}$  alone. Our findings support the idea that at least some members of  
390 the SAR11 clade rely on organic P to support growth, which is also supplemented by the use of  
391 cellular P-sparing adaptations such as lipid renovation (1). Despite potential methodological  
392 issues with the measurement of cellular C content, the N and P cell quotas, production,  
393 respiration, and cell size measurements reported here provide new information for scientists and  
394 modelers interested in understanding the impact of SAR11 cells on the ecology of the global  
395 ocean.  
396  
397

## 398 **Materials & Methods**

399 SAR11 strain HIMB114 was previously isolated from Kaneohe Bay on the northeastern  
400 shore of the island of Oahu in the tropical Pacific Ocean using a dilution-to-extinction approach  
401 (2, 41). It is a member of subclade IIIa that, based on genome comparisons, exhibits genus-level  
402 divergence from the comparatively well-studied members of subgroup Ia (i.e. ‘*Candidatus*  
403 *Pelagibacter*’) (19, 42, 43). HIMB114 would not grow in defined artificial seawater-based media  
404 previously published for SAR11 (5, 40), nor could we enhance its cellular yield by previous  
405 organic carbon, vitamin, and nutrient additions that have proven successful for other SAR11  
406 strains (7, 8, 11) (data not shown). Thus, all experiments were performed in natural seawater-  
407 based minimal media with seawater collected from the southern basin of Kaneohe Bay (21°  
408 26.181’ N, 157° 46.642’ W). To make growth media, 200 L of surface seawater was filtered  
409 through pre-rinsed (10 L sterile water followed by 10 L seawater) 0.1 µm pore-sized  
410 polyethersulfone (PES) membranes (AcroPak 1000; Pall Corp., Port Washington, NY, USA) into  
411 clean 10 L polycarbonate (PC) carboys. Individual 10 L batches of seawater were subsequently  
412 autoclaved for 2.5 hours (h) at 121 °C and allowed to cool. For both batch and chemostat media  
413 (media termed “K-Bay”), the seawater base was amended with nitrate (3 µmol L<sup>-1</sup> NaNO<sub>3</sub>),  
414 NH<sub>4</sub><sup>+</sup> (3 µmol L<sup>-1</sup> NH<sub>4</sub>Cl), PO<sub>4</sub><sup>3-</sup> (0.1 µmol L<sup>-1</sup> KH<sub>2</sub>PO<sub>4</sub>), and a vitamin stock solution added at  
415 10<sup>-5</sup> dilution (10<sup>-6</sup> dilution for the chemostat medium) (2). All chemicals were BioUltra grade  
416 (MilliporeSigma, St. Louis, MO, USA). The vitamin stock solution contained B1 (thiamine  
417 hydrochloride, 1 g L<sup>-1</sup>); B3 (niacin, 0.1 g L<sup>-1</sup>), B5 (pantothenic acid, 0.2 g L<sup>-1</sup>); B6 (pyridoxine,  
418 0.1 g L<sup>-1</sup>); B7 (biotin, 1 mg L<sup>-1</sup>); B9 (folic acid, 2 mg L<sup>-1</sup>); B12 (cyanocobalamin, 1 mg L<sup>-1</sup>);  
419 myo-inositol (1 g L<sup>-1</sup>); and PABA (4-aminobenzoic acid, 0.1 g L<sup>-1</sup>). Following nutrient  
420 additions, small amounts of autoclaved-sterile milli-Q deionized-water was added to the K-Bay

421 media to replace water lost as a result of autoclaving, achieving a final salinity of 32. The media  
422 were then sparged with CO<sub>2</sub>, followed by air, through three in-line Whatman (GE Healthcare  
423 Life Sciences, Chicago, IL, USA) vent filters (HEPA 0.3 µm glass fiber to 0.2 µm PTFE to 0.1  
424 µm PTFE) to restore the inorganic C chemistry and to bring the media pH to between 8.0 and  
425 8.1, and stored at 4 °C until use. HIMB114 cultures were grown in batch at 26 °C under low light  
426 (33 µmol quanta m<sup>-2</sup> s<sup>-1</sup>) and a 12/12 light/dark cycle in volumes ranging from 100 mL to 10 L,  
427 as well as a 4 L continuous culture chemostat system (described below).

428

429 **Chemostat.** For continuous culture growth, a custom-built 4 L PC chemostat was constructed  
430 using a narrow mouth 4 L PC bottle, 4-port Teflon threaded cap, PC Luer connection fittings,  
431 and silicone tubing for the inflow of growth medium, culture overflow, air bubbling, and culture  
432 sampling ports. The chemostat was kept under positive pressure by bubbling with 0.1 µm-filtered  
433 air, which served to keep the culture well-mixed as well as provide positive pressure for culture  
434 sampling. Media was pumped from a 10 L PC carboy continuously at 0.85 mL min<sup>-1</sup> for a target  
435 dilution rate of 0.3 d<sup>-1</sup>. Overflow was continuously removed into a PC bottle used as an overflow  
436 container. To start the continuously growing culture, the chemostat was filled to 2 L with the K-  
437 Bay chemostat medium (Table 2), inoculated with 5 mL of a growing HIMB114 culture, and  
438 allowed to grow in batch, where it reached an exponential growth rate of 0.75 d<sup>-1</sup> for 10 days  
439 before media in-flow was started (Fig. 5). After reaching the full 4 L chemostat volume, cell  
440 densities stabilized at 7×10<sup>5</sup> mL<sup>-1</sup> after approximately 5 days, and remained in continuous  
441 culture for 12 days or about 5 doubling times with continuous media inflow and culture overflow  
442 (Fig. 5). The culture was grown in the chemostat for a total of 40 days; however, following the  
443 connection of the third 10 L batch of new K-Bay chemostat medium at day 30, cell densities

444 slowly declined to  $3.5 \times 10^5 \text{ mL}^{-1}$  by the end of the 40 days when the chemostat was turned off  
445 (Fig. 5).

446

447 **Cell enumeration and image analysis.** Culture cell counts were made by 4',6-diamidino-2-  
448 phenylindole (DAPI) staining and subsequent epifluorescence microscopy. Depending on culture  
449 density, between 2 to 10 mL culture samples were fixed with 20% electron microscopy grade  
450 paraformaldehyde solution (Electron Microscopy Sciences, Hatfield, PA, USA) to a final fixative  
451 concentration of 0.4%, and stored at 4 °C overnight. DAPI was subsequently added to a final  
452 concentration of  $5 \mu\text{g L}^{-1}$  and incubated in the dark at room temperature for at least 20 minutes.  
453 Stained samples were filtered onto 25 mm diameter, 0.2  $\mu\text{m}$  pore-sized, black Nuclepore (GE  
454 Healthcare Life Sciences) or Isopore (MilliporeSigma) PC membranes, with a 0.8  $\mu\text{m}$  pore-sized  
455 GN-4 (Pall Corp.) mixed cellulose ester backing filter. Filters were allowed to air dry for 15  
456 minutes and either stored frozen (-20 °C) or mounted in high-viscosity immersion oil on a glass  
457 slide for microscopic enumeration. At the volumes filtered, the precision of epifluorescence  
458 microscope cell counts were between 10% to 20% for densities above  $10^4 \text{ mL}^{-1}$ . Cell number  
459 and size information (including cell lengths and widths) were calculated by image detection  
460 software from DAPI stained epifluorescence images captured with a Retiga EXi FAST1394  
461 camera (QImaging, Surrey, BC, Canada) at 1000x magnification.

462 Cell morphology was also visualized via scanning electron microscopy. HIMB114 cells  
463 grown in K-bay media to early stationary phase were fixed with gluteraldehyde (20%; Electron  
464 Microscopy Sciences), filtered onto 0.2  $\mu\text{m}$  pore-sized PC membranes (Nuclepore), washed with  
465 sodium cacodylate buffer, post-fixed in osmium tetroxide, and subjected to sequential ethanol  
466 dehydration, critical point drying with  $\text{CO}_2$ , and coating with gold/palladium. The preps were

467 viewed on a Hitachi S-4800 Field Emission Scanning Electron Microscope with Oxford INCA  
468 X-Act EDS System.  
469  
470 **PO<sub>4</sub><sup>3-</sup> uptake.** Rates of PO<sub>4</sub><sup>3-</sup> uptake were measured in both batch and continuous culture using  
471 <sup>33</sup>P-radiotracer methods (18). In brief, between 10–50 mL aliquots of growing culture were  
472 sampled into 50 mL PC tubes and spiked with <sup>33</sup>P-orthophosphoric acid (158 Ci mg<sup>-1</sup>;  
473 PerkinElmer, Waltham, MA, USA) to a specific activity of 50 μCi L<sup>-1</sup>. <sup>33</sup>P-labeled cultures were  
474 incubated (typically for 4 to 8 h) under identical growth conditions to the parent cultures. Sample  
475 time points were collected by low-vacuum filtration of 5 mL onto 0.2 μm pore-sized, 25 mm  
476 diameter PC Nuclepore membranes, each filter having been pre-saturated with unlabeled PO<sub>4</sub><sup>3-</sup>  
477 by the addition of 1 mL of high PO<sub>4</sub><sup>3-</sup> (0.1 mmol L<sup>-1</sup> PO<sub>4</sub>) seawater to each filter prior to  
478 sampling (Suppl. Info.). Following filtration of <sup>33</sup>P-labeled samples, filters were rinsed with 10  
479 mL of 0.2 μm-filtered seawater. Along with the culture samples, 0.2 μm-filtered seawater  
480 controls amended with <sup>33</sup>P-radiotracer served as non-biological blanks; these blanks were  
481 incubated and processed identical to samples. Phosphate uptake kinetics were also conducted for  
482 nine treatments of increasing PO<sub>4</sub><sup>3-</sup> concentration by the addition of 1 – 20 μL of concentrated  
483 unlabeled phosphate stocks (0.1 – 1 mmol L<sup>-1</sup> KH<sub>2</sub>PO<sub>4</sub>) to 11 mL chemostat culture samples.  
484 The treatments and filtered seawater controls were subsampled (2 mL) at 5 time points over 22  
485 hours of batch growth.

486  
487 **Bacterial production.** Bacterial production was estimated based on the incorporation of  
488 tritiated-leucine (<sup>3</sup>H-Leu) into protein using small volume (1.5 mL) sample incubations based on

489 the microcentrifugation method (44) (Suppl. Info.). Leucine incorporation rates were converted  
490 into C production rates using a standard  $1.5 \text{ kg C mol Leu}^{-1}$  conversion factor (36).

491  
492 **Oxygen respiration.** Respiration rates were measured in batch cultures of strain HIMB114  
493 based on time-dependent changes in oxygen to argon ( $\text{O}_2/\text{Ar}$ ) ratios measured by membrane inlet  
494 mass spectrometry (MIMS) (45) (Suppl. Info.). Cultures growing in late exponential phase in 10  
495 L PC carboys were siphoned using silicone tubing into 70 mL clear glass serum bottles, allowed  
496 to overflow, capped with Teflon lined rubber stoppers, and crimped sealed. The glass bottles  
497 were extensively cleaned with milli-Q DI-water and 10% hydrochloric acid, and finally  
498 autoclaved while filled with milli-Q DI-water before use. Sample bottles were filled in triplicate  
499 for each time point, with 5 time points sampled over a two-day period, and in one case a four-day  
500 period. Bottles were incubated under the same temperature and light conditions as the original  
501 cultures, and either run immediately at each time point or killed by syringe addition of 100  $\mu\text{L}$  of  
502 saturated mercuric chloride solution and analyzed at the end of the incubations.

503  
504 **Monte Carlo simulation.** A Monte Carlo simulation study was conducted to quantify statistical  
505 errors in the oxygen-based respiration, bacterial production, and BGE measurements. Simulated  
506 data for  $\text{O}_2$  concentrations and leucine incorporation rates from the respiration and production  
507 experiments were generated by sampling ( $N=10,000$ ) from independent, normal distributions  
508 using sample means and variances based on experimental replicate measurements. Linear  
509 regression slopes were computed on the simulated  $\text{O}_2$  concentration samples with time to obtain  
510 simulated  $\text{O}_2$  respiration rates separately for each of three incubation experiments, with  
511 regression slopes bounded by zero (i.e., simulated data was prevented from indicating net  $\text{O}_2$



512 production with time). To convert from O<sub>2</sub> and leucine units into carbon units, no uncertainty  
513 was assumed in the conversion factors, as we were attempting to estimate the statistical error  
514 from our measurement replication. BGE was calculated as indicated above, and 95% confidence  
515 intervals (2.5% and 97.5% quantiles) were calculated for each measurement by experiment  
516 (Table 2) and for the final reported mean BGE measure.

517  
518 **Dissolved nutrients.** Samples for dissolved inorganic nutrients and TOC analyses were taken  
519 from both the original medium as well as the final spent medium at the end of culture  
520 incubations. Samples were collected in acid washed, DI-water rinsed plastic (inorganic nutrients)  
521 or glass (TOC) containers, and stored frozen until analysis. Dissolved inorganic nutrient samples  
522 were analyzed on a Analytical Segmented Flow Injection AutoAnalyzer AA3 HR (SEAL  
523 Analytical Inc., Mequon, WI) for the determination of PO<sub>4</sub><sup>3-</sup>, NH<sub>4</sub><sup>+</sup>, nitrate + nitrite (NO<sub>3</sub><sup>-</sup> +  
524 NO<sub>2</sub><sup>-</sup>), silicate (SiO<sub>4</sub>), and total N. Samples for TOC were acidified and O<sub>2</sub> purged to remove  
525 inorganic C, and measured using high temperature catalytic oxidation on a Shimadzu TOC-L  
526 (Schimadzu Scientific Instruments Inc., Columbia, MD).

527  
528 **Cellular elemental analysis.** Six individual 10 L cultures of HIMB114 were grown in batch for  
529 the purpose of collecting 20 L of cultured cells onto triplicate Advantec GF-75, 25 mm diameter  
530 glass fiber filters (Sterlitech, Kent, WA, USA), with a nominal pore size of 0.3 μm, for  
531 subsequent measurements of cellular C and N quotas. Filters were dried, pelleted, and analyzed  
532 using an elemental analyzer (CE440 elemental analyzer, Exeter Analytical, North Chelmsford,  
533 MA, USA). The batch cultures were filtered by slowly pumping the cultures from 10 L carboys  
534 into large volume filter towers containing combusted 25 mm GF-75 filters; the filtrate was

535 retained in separate 10 L collection carboys for subsequent microscopic analyses to assess the  
536 cellular retention efficiency of the filters. A total volume of 30 L was filtered through each  
537 membrane filter: 20 L from two separate 10 L cultures, and 10 L of culture filtrate containing  
538 cells that passed through the first filtration. The cell retention efficiencies of the filters declined  
539 in each successive 10 L round, from a mean retention of 37% in the first round, down to 9% in  
540 the final third round of filtration from the filtrate. The overall cell retention rate for the full  
541 filtration procedure was 40%, resulting in an average of  $5 \pm 2 \times 10^9$  cells (mean  $\pm$  s.d.; n=3) on  
542 each filter. Preliminary tests indicated that procedural blanks were necessary to account for  
543 adsorption of non-cellular dissolved C and N onto the filter (Suppl. Info.).

544 For the determination of cellular P, 4 to 5 L of culture were collected by peristaltic pump  
545 filtration at a flow rate of  $8 \text{ mL min}^{-1}$  onto  $0.2 \mu\text{m}$  pore-size, 47 mm diameter PC Nuclepore  
546 filters. All filtrations occurred in a walk-in cold room at  $4 \text{ }^\circ\text{C}$  for 8 to 10 h. Procedural blanks of  
547 spent media were also made by filtering 50 mL of  $0.2 \mu\text{m}$  media filtrate, that is, the same media  
548 in which the cultures were grown with cells removed, onto the  $0.2 \mu\text{m}$ , 47 mm-diameter PC  
549 filters. Following filtration, filters were placed in acid-cleaned glass test tubes, covered with  
550 combusted aluminum foil and stored at  $-20 \text{ }^\circ\text{C}$  until analysis. Cellular P was quantified by a  
551 modification of the high temperature combustion, colorimetric molybdate method (46) (Suppl.  
552 Info.).

553

554 **Acknowledgements**

555           We thank E. Omori and K. Manoi for laboratory assistance, the laboratory of Craig  
556 Carlson at the University of California, Santa Barbara for TOC measurements, and D. Karl for  
557 early review and feedback on this research. Nutrient samples were analyzed by the SOEST  
558 Analytical laboratory at the University of Hawaii at Manoa. This research was supported by  
559 funding from National Science Foundation grant OCE-1538628 to MSR and the Center for  
560 Microbial Oceanography: Research and Education (C-MORE, NSF Science and Technology  
561 Center award EF-0424599). SF was funded by a C-MORE fellowship. This is SOEST  
562 contribution xxxx and HIMB contribution xxxx.

563

564

565 **References**

- 566 1. Giovannoni SJ. 2017. SAR11 bacteria: The most abundant plankton in the oceans. *Ann*  
567 *Rev Mar Sci* 9:231–255.
- 568
- 569 2. Rappé MS, Connon SA, Vergin KL, Giovannoni SJ. 2002. Cultivation of the ubiquitous  
570 SAR11 marine bacterioplankton clade. *Nature* 2012:630–633.
- 571
- 572 3. Zhao X, Schwartz CL, Pierson J, Giovannoni SJ, McIntosh JR, Nicastro D. 2017. Three-  
573 dimensional structure of the ultraoligotrophic marine bacterium "*Candidatus Pelagibacter*  
574 *ubique*". *Appl Environ Microbiol* 83:e02807–16.
- 575
- 576 4. Steindler L, Schwalbach MS, Smith DP, Chan F, Giovannoni SJ. 2011. Energy starved  
577 *Candidatus Pelagibacter ubique* substitutes light-mediated ATP production for endogenous  
578 carbon respiration. *PLoS ONE* 6:e19725.
- 579
- 580 5. Carini P, Steindler L, Beszteri S, Giovannoni SJ. 2013. Nutrient requirements for growth of  
581 the extreme oligotroph '*Candidatus Pelagibacter ubique*' HTCC1062 on a defined medium.  
582 *ISME J* 7:592–602.
- 583
- 584 6. Raven JA. 1998. The twelfth Tansley Lecture. Small is beautiful: the picophytoplankton.  
585 *Funct Ecol* 12:503–513.
- 586

- 587 7. Tripp HJ, Kitner JB, Schwalbach MS, Dacey JWH, Wilhelm LJ, Giovannoni SJ. 2008.  
588 SAR11 marine bacteria require exogenous reduced sulphur for growth. *Nature* 452:741–  
589 744.  
590
- 591 8. Tripp HJ, Schwalbach MS, Meyer MM, Kitner JB, Breaker RR, Giovannoni SJ. 2009.  
592 Unique glycine-activated riboswitch linked to glycine-serine auxotrophy in SAR11.  
593 *Environ Microbiol* 11:230–238.  
594
- 595 9. Schwalbach MS, Tripp HJ, Steindler L, Smith DP, Giovannoni SJ. 2010. The presence of  
596 the glycolysis operon in SAR11 genomes is positively correlated with ocean productivity.  
597 *Environ Microbiol* 12:490–500.  
598
- 599 10. Sun J, Steindler L, Thrash JC, Halsey KH, Smith DP, Carter AE, Landry ZC, Giovannoni  
600 SJ. 2011. One carbon metabolism in SAR11 pelagic marine bacteria. *PLoS ONE* 6:e23973.  
601
- 602 11. Carini P, Campbell EO, Morré J, Sañudo-Wilhelmy SA, Thrash JC, Bennett SE,  
603 Temperton B, Begley T, Giovannoni SJ. 2014. Discovery of a SAR11 growth requirement  
604 for thiamin's pyrimidine precursor and its distribution in the Sargasso Sea. *ISME J* 8:1727–  
605 1738.  
606
- 607 12. Carini P, White AE, Campbell EO, Giovannoni SJ. 2014. Methane production by  
608 phosphate-starved SAR11 chemoheterotrophic marine bacteria. *Nature Comm* 5:4346.  
609

- 610 13. Dyhrman ST, Ammerman JW, Van Mooy BAS. 2007. Microbes and the marine  
611 phosphorus cycle. *Oceanogr* 20:110-116.  
612
- 613 14. Karl DM 2014. Microbially mediated transformations of phosphorus in the sea: new views  
614 of an old cycle. *Ann Rev Mar Sci* 6:279–337.  
615
- 616 15. Rusch DB, Halpern AL, Sutton G, Heidelberg KB, Williamson S, Yooseph S, Wu D, Eisen  
617 JA, Hoffman JM, Remington K, Beeson K, Tran B, Smith H, Baden-Tillson H, Stewart C,  
618 Thorpe J, Freeman J, Andrews-Pfannkoch C, Venter JE, Li K, Kravitz S, Heidelberg JF,  
619 Utterback T, Rogers Y-H, Falcón LI, Souza V, Bonilla-Rosso G, Eguiarte LE, Karl DM,  
620 Sathyendranath S, Platt T, Bermingham E, Gallardo V, Tamayo-Castillo G, Ferrari MR,  
621 Strausberg RL, Nealson K, Friedman R, Frazier M, Venter JC. 2007. The Sorcerer II  
622 Global Ocean Sampling Expedition: Northwest Atlantic through Eastern Tropical Pacific.  
623 *PLoS Biol* 5:e77.  
624
- 625 16. Martiny AC, Coleman ML, Chisholm SW. 2006. Phosphate acquisition genes in  
626 *Prochlorococcus* ecotypes: evidence for genome-wide adaptation. *Proc Natl Acad Sci USA*  
627 103:12552–12557.  
628
- 629 17. Coleman ML, Chisholm SW. 2010. Ecosystem-specific selection pressures revealed  
630 through comparative population genomics. *Proc Natl Acad Sci USA* 107:18634–18639.  
631

- 632 18. Grant SR, Bienfang PK, Laws EA. 2013. Steady-state bioassay approach applied to  
633 phosphorus-limited continuous cultures: A growth study of the marine chlorophyte  
634 *Dunaliella salina*. *Limnol Oceanogr* 58:314–324.  
635
- 636 19. Grote J, Thrash JC, Huggett MJ, Landry ZC, Carini P, Giovannoni SJ, Rappé MS. 2012.  
637 Streamlining and core genome conservation among highly divergent members of the  
638 SAR11 clade. *mBio* 3:e00252–12.  
639
- 640 20. Karl DM, Björkman KM. 2002. Dynamics of DOP, p 249–366. *In* Hansell DA, Carlson CA  
641 (ed), *Biogeochemistry of marine dissolved organic matter*. Elsevier Science.  
642
- 643 21. Kolowitz LC, Ingall ED, Benner R. 2001. Composition and cycling of marine organic  
644 phosphorus. *Limnol Oceanogr* 46:309–320.  
645
- 646 22. Karl DM, Beversdorf L, Björkman KM, Church MJ, Martinez A, DeLong EF. 2008.  
647 Aerobic production of methane in the sea. *Nat Geosci* 1:473-478.  
648
- 649 23. Luo H, Zhang H, Long RA, Benner R. 2011. Depth distributions of alkaline phosphatase  
650 and phosphonate utilization genes in the North Pacific Subtropical Gyre. *Aquat Microb*  
651 *Ecol* 62:61-69.  
652

- 653 24. Villarreal-Chiu JF, Quinn JP, McGrath JW. 2012. The genes and enzymes of phosphonate  
654 metabolism by bacteria, and their distribution in the marine environment. *Front Microbiol*  
655 3:19.
- 656
- 657 25. Chin JP, Quinn JP, McGrath JW. 2018. Phosphate insensitive aminophosphonate  
658 mineralisation within oceanic nutrient cycles. *ISME J* 12:973-980.
- 659
- 660 26. Gundersen K, Heldal M, Norland S, Purdie DA, Knap AH. 2002. Elemental C, N, and P  
661 cell content of individual bacteria collected at the Bermuda Atlantic Time-Series Study  
662 (BATS) site. *Limnol Oceanogr* 47:1525–1530.
- 663
- 664 27. Makino W, Cotner JB, Sterner RW, Elser JJ. 2003. Are bacteria more like plants or  
665 animals? Growth rate and resource dependence of bacterial C:N:P stoichiometry. *Funct*  
666 *Ecol* 17:121–130.
- 667
- 668 28. Van Mooy BAS, Fredricks HF, Pedler BE, Dyhrman ST, Karl DM, Koblizek M, Lomas  
669 MW, Mincer TJ, Moore LR, Moutin T, Rappé MS, Webb EA. 2009. Phytoplankton in the  
670 ocean use non-phosphorus lipids in response to phosphorus scarcity. *Nature* 458:69–72.
- 671
- 672 29. Kemp PF, Lee S, LaRoche J. 1993. Estimating the growth-rate of slowly growing marine-  
673 bacteria from RNA-content. *Appl Environ Microbiol* 59:2594–2601.
- 674



- 675 30. Fagerbakke KM, Heldal M, Norland S. 1996. Content of carbon, nitrogen, oxygen, sulfur  
676 and phosphorus in native aquatic and cultured bacteria. *Aquat Microb Ecol* 10:15–27.  
677
- 678 31. Carini P, Van Mooy BAS, Thrash JC, White A, Zhao Y, Campbell EO, Fredricks HF,  
679 Giovannoni SJ. 2015. SAR11 lipid renovation in response to phosphate starvation. *Proc*  
680 *Natl Acad Sci USA* 112:7767–7772.  
681
- 682 32. Van Mooy BAS, Rocap G, H. F. Fredricks HF, C. T. Evans CT, and A. H. Devol AH.  
683 2006. Sulfolipids dramatically decrease phosphorus demand by picocyanobacteria in  
684 oligotrophic marine environments. *Proc Natl Acad Sci USA* 103:8607–8612.  
685
- 686 33. Martiny AC, Vrugt JA, Primeau FW, Lomas MW. 2013. Regional variation in the  
687 particulate organic carbon to nitrogen ratio in the surface ocean. *Global Biogeochem*  
688 *Cycles* 27:723–731 doi: 10.1002/gbc.20061.  
689
- 690 34. Cermak N, Becker JW, Knudsen SM, Chisholm SW, Manalis SR, Polz MF. 2017. Direct  
691 single-cell biomass estimates for marine bacteria via Archimedes’ principle. *ISME J*  
692 11:825-828.  
693
- 694 35. Church MJ, Ducklow HW, Letelier RM, Karl DM. 2006. Temporal and vertical dynamics  
695 in picoplankton photoheterotrophic production in the subtropical North Pacific Ocean.  
696 *Aquat Microb Ecol* 45:41–53.  
697

- 698 36. del Giorgio PA, Condon R, Bouvier T, Longnecker K, Bouvier C, Sherr E, Gasol JM.  
699 2011. Coherent patterns in bacterial growth, growth efficiency, and leucine metabolism  
700 along a northeastern Pacific inshore-offshore transect. *Limnol Oceanogr* 56:1–16.  
701
- 702 37. Malmstrom RR, Cottrell MT, Elifantz H, Kirchman DL. 2005. Biomass production and  
703 assimilation of dissolved organic matter by SAR11 bacteria in the Northwest Atlantic  
704 Ocean. *Appl Environ Microbiol* 71:2979–2986.  
705
- 706 38. del Giorgio P, Cole J. 2000. Bacterial energetics and growth efficiency, p 289-325. *In*  
707 Kirchman D (ed), *Microbial Ecology of the Oceans*. Wiley-Liss.  
708
- 709 39. Simon M, Azam F. 1989. Protein-content and protein-synthesis rates of planktonic marine-  
710 bacteria. *Mar Ecol Prog Ser* 51:201–213.  
711
- 712 40. Henson MW, Pitre DM, Weckhorst JL, Lanclos VC, Webber AT, Thrash JC. 2016.  
713 Artificial seawater media facilitate cultivating members of the microbial majority from the  
714 Gulf of Mexico. *mSphere* 1:e00028–16.  
715
- 716 41. Brandon M. 2006. High-throughput isolation of pelagic marine bacteria from the coastal  
717 subtropical Pacific Ocean. MS Thesis. University of Hawaii at Manoa.  
718

- 719 42. Thrash JC, Boyd A, Huggett MJ, Grote J, Carini P, Yoder RJ, Robbertse B, Spatafora JW,  
720 Rappé MS, Giovannoni SJ. 2011. Phylogenomic evidence for a common ancestor of  
721 mitochondria and the SAR11 clade. *Sci Rep* 1:1–9.  
722
- 723 43. Parks DH, Chuvochina M, Waite DW, Rinke C, Skarszewski A, Chaumeil PA, Hugenholtz  
724 P. 2018. A proposal for a standardized bacterial taxonomy based on genome phylogeny.  
725 bioRxiv 256800.  
726
- 727 44. Smith DC, Azam F. 1992. A simple, economical method for measuring bacterial protein  
728 synthesis rates in seawater using tritiated-leucine. *Mar Microb Food Webs* 6:107–114.  
729
- 730 45. Ferrón S, del Valle DA, Björkman KM, Quay PD, Church, MJ, Karl DM. 2016.  
731 Application of membrane inlet mass spectrometry to measure aquatic gross primary  
732 production by the  $^{18}\text{O}$  *in vitro* method. *Limnol Oceanogr Methods* 14:610-622.  
733
- 734 46. Solorzano L, Sharp JH. 1980. Determination of total dissolved phosphorus and particulate  
735 phosphorus in natural-waters. *Limnol Oceanogr* 25:754–757.  
736

## 737 **Figure Legends**

738 Figure 1. Scanning electron micrographs of HIMB114 cells growing in early stationary phase  
739 batch culture. The scale bar corresponds to 1  $\mu\text{m}$ .

740

741 Figure 2. Rates of  $\text{PO}_4^{3-}$  uptake by SAR11 strain HIMB114. (A) Time course measurements of  
742  $^{33}\text{P}$ -phosphate uptake in a chemostat culture of HIMB114 (upper) as well as a batch culture  
743 (lower) with blank controls (circles). Solid lines indicate the linear least squares regression,  
744 while dashed lines indicate the 95% prediction confidence bands. (B)  $^{33}\text{P}$ -phosphate uptake  
745 kinetics for a chemostat culture of HIMB114, calculated from single time point, 22-hour  
746 incubations across a range of phosphate concentrations.

747

748 Figure 3. Production and respiration of strain HIMB114 during growth in batch culture. (A)  
749 Cellular growth (filled circles), bacterial production ( $^3\text{H}$ -Leu; open squares), and dissolved  
750 oxygen concentrations (open diamonds) for a 10 L batch culture of HIMB114 measured  
751 throughout late exponential and into stationary phase (Table 2, experiment 1). (B) Bacterial  
752 production, expressed as molecules leucine per cell per hour over two-hour incubations, vs. daily  
753 specific growth rates for the same batch cultures of strain HIMB114, calculated by changes in  
754 cell densities between cultures sampled one day apart. The slope of the fit line between  
755 production and daily specific growth rate is  $0.8 \pm 0.3$  (95% C.I.)  $\times 10^6$  molecules Leu cell $^{-1}$ .

756

757 Figure 4. Respiration of strain HIMB114 during growth in batch culture. (A) Two oxygen  
758 respiration incubation experiments (experiments 2 and 3) started from a 10 L batch culture of  
759 strain HIMB114 during late exponential phase of growth. (B) Triangles and diamonds represent

760 the mean oxygen concentration for each time point in the second and third incubation  
761 experiment, respectively (Table 2, experiments 2 & 3). Error bars represent the standard  
762 deviation.

763  
764 Figure 5. Chemostat continuous culture of SAR11 strain HIMB114. HIMB114 cells growing at  
765  $0.3 \text{ d}^{-1}$  in chemostat continuous culture in natural seawater media at  $26 \text{ }^{\circ}\text{C}$ . Standard deviation of  
766 cell counts are indicated by error bars. The grey box indicates the time when filling the  
767 chemostat, while dotted lines indicate when media in-flow started and new 10 L media reservoirs  
768 were connected.

769

770

771

772 Table 1. Mean ( $\pm$  standard deviation), minimum, and maximum bacterial production rates for  
773 SAR11 strain HIMB114 grown on sterilized K-bay seawater medium. Production (n=20) was  
774 measured in both batch and chemostat cultures by  $^3\text{H}$ -Leucine incorporation and converted to C  
775 units with a leucine to C conversion factor of  $1.5 \text{ kg C mol Leu}^{-1}$ .

|      | pmol Leu<br>$\text{L}^{-1} \text{ h}^{-1}$ | amol Leu<br>$\text{cell}^{-1} \text{ h}^{-1}$ | $\mu\text{g C}$<br>$\text{L}^{-1} \text{ d}^{-1}$ | fmol C<br>$\text{cell}^{-1} \text{ d}^{-1}$ |
|------|--------------------------------------------|-----------------------------------------------|---------------------------------------------------|---------------------------------------------|
| Mean | $16 \pm 6.5$                               | $0.04 \pm 0.02$                               | $0.6 \pm 0.2$                                     | $0.13 \pm 0.07$                             |
| Max  | 28                                         | 0.1                                           | 1.0                                               | 0.29                                        |
| Min  | 5                                          | 0.01                                          | 0.2                                               | 0.03                                        |

776

777

778

779 Table 2. Summary of experiments to measure respiration by the time dependent consumption of  
 780 dissolved O<sub>2</sub> in late-log phase batch cultures SAR11 strain HIMB114. Growth rates were  
 781 calculated by linear least squares regression of cell density over the 2-day incubation periods.  
 782 Note that Experiment 1 was conducted toward the transition out of log-phase and into stationary  
 783 phase growth, with an associated flattening growth curve. Respiration was measured by linear  
 784 least squares regression of Oxygen concentration with time over the 2-day incubations. Bacterial  
 785 production values are 2-day means of daily, 2-hour Leucine incubations. Bacterial growth  
 786 efficiency (BGE) was calculated as described in the text, assuming a respiratory quotient of 1  
 787 mol C: mol O<sub>2</sub>.

| Exp. | Growth rate                          | Abundance                                                    | Respiration                                                               |                                                                               | Production                                                 |                                                                  | BGE                       |
|------|--------------------------------------|--------------------------------------------------------------|---------------------------------------------------------------------------|-------------------------------------------------------------------------------|------------------------------------------------------------|------------------------------------------------------------------|---------------------------|
|      | Slope<br>±s.e.<br>(d <sup>-1</sup> ) | Mean<br>[min, max]<br>x10 <sup>8</sup> cells L <sup>-1</sup> | Mean<br>[min, max]<br>μmol O <sub>2</sub> L <sup>-1</sup> d <sup>-1</sup> | Mean<br>(±95% C.I.)<br>fmol O <sub>2</sub> cell <sup>-1</sup> d <sup>-1</sup> | Mean<br>[min, max]<br>μg C L <sup>-1</sup> d <sup>-1</sup> | Mean<br>(±95% C.I.)<br>fmol C cell <sup>-1</sup> d <sup>-1</sup> | Mean<br>[min, max]<br>(%) |
| 1    | 0.15 ±0.2                            | 4.0<br>[3.5, 5.3]                                            | 0.36<br>[0.10, 0.61]                                                      | 0.90 ±0.65                                                                    | 0.41<br>[0.30, 0.52]                                       | 0.09 ±0.03                                                       | 9<br>[5, 26]              |
| 2    | 0.9 ±0.2                             | 3.3<br>[1.9, 4.8]                                            | 0.44<br>[0.27, 0.60]                                                      | 1.32 ±0.76                                                                    | 0.82<br>[0.70, 0.93]                                       | 0.27 ±0.06                                                       | 13<br>[10, 21]            |
| 3    | 0.5 ±0.1                             | 4.2<br>[3.3, 4.8]                                            | 0.32<br>[0.14, 0.50]                                                      | 0.75 ±0.44                                                                    | 0.77<br>[0.66, 0.87]                                       | 0.17 ±0.04                                                       | 17<br>[11, 32]            |

788

789

790 Table 3. Nutrient concentrations ( $\mu\text{mol L}^{-1}$ ) for dissolved phosphate ( $\text{PO}_4^{3-}$ ), nitrate plus nitrite  
791 ( $\text{NO}_3^- + \text{NO}_2^-$ ), ammonium ( $\text{NH}_4^+$ ), silicate ( $\text{SiO}_4$ ), total organic C (TOC), and total nitrogen  
792 (TN) for natural Kaneohe Bay (K-Bay) seawater with no additions, and the standard SW based  
793 medium used to grow HIMB114 in both batch and chemostat cultures.

794

|                       | $\text{PO}_4^{3-}$ | $\text{NO}_3^- + \text{NO}_2^-$ | $\text{NH}_4^+$ | $\text{SiO}_4$ | DOC | TN   |
|-----------------------|--------------------|---------------------------------|-----------------|----------------|-----|------|
| K-Bay seawater        | 0.05               | <0.009                          | 0.3             | 4.3            | 75  | 7.5  |
| K-Bay standard medium | 0.15               | 2.4                             | 3.4             | 4.2            | 94  | 13.5 |

795

796

797

798



799 **Supplemental Material**

800

801 **Supplemental Methods.**

802

803 **Table S1.** Presence of genes for phosphorus uptake and metabolism in selected publicly  
804 available SAR11 genomes sequenced from cultivated strains.

805

806 **Figure S1.** Batch culture growth curves for six replicate 10 L cultures of HIMB114. Lower error  
807 bars represent the standard deviation among count fields (typically 10-15), while upper error bars  
808 represent the cell density if morphologies representing multiple cells are converted to single cell  
809 units. The mean regression slope for exponential specific growth rate for the cultures is 1.08 (s.d.  
810 0.03)  $d^{-1}$ . Strains were grown in using standard media at 26 °C.

811

812 **Figure S2.** Cell size analysis of SAR11 strain HIMB114. Distribution of (A) length, (B) width,  
813 and (C) biovolume for N=769 cells, with fit to log-normal distribution.

814

815 **Figure S3.** Filtered media blanks for particulate carbon and nitrogen measurements, as a  
816 function of volume of media filtered. Filtered media (47 mm diameter, 0.2  $\mu m$  pore-size  
817 Nuclepore PC membrane followed by 0.22  $\mu m$  pore-size, Sterivex-GP polyethersulfone  
818 membrane) was used as the source for procedural blanks filtered through combusted GF-75  
819 glass-fiber filters to correct for adsorption of (A) dissolved organic carbon or (B) inorganic  
820 nitrogen. Carbon data fit to a rectangular hyperbolic saturation function: Blank =  $8.5(\mu gC) +$

821  $\frac{43.5(\mu gC) \cdot V}{1.9(L)+V}$  for medium volume (V) in liters. Nitrogen data fit to a rectangular hyperbolic

822 saturation function: Blank =  $1.1(\mu gN) + \frac{8.1(\mu gN) \cdot V}{2.4(L)+V}$  for medium volume (V) in liters.

823

824 **Figure S4.** Bacterial production versus batch culture growth of strain HIMB114. Bacterial  
825 production (measured by  $^3\text{H}$ -Leu incorporation) during batch culture growth of a single 10 L  
826 culture of strain HIMB114, sampled throughout late exponential phase and into stationary phase.  
827 Open circles and dotted line indicate cell density, while filled squares and solid line indicate  
828 bacterial production.

829

830 **Figure S5.** Volume scaling of the fraction of total cell volume occupied by the genome (solid  
831 line) and the cell envelope (dashed line) for a theoretical bacterial cell. Cell size parameters  
832 calculated assuming spherical cells, with volume of the cell envelope calculated assuming a  
833 spherical shell with an envelope thickness of 20 nm. Genome volume calculated assuming a  
834 genome length of 1.237 Mbp, and a DNA volume per base pair of  $1 \text{ nm}^3$ . At the volume of the  
835 most frequent HIMB114 cell ( $0.05 \mu\text{m}^3$ ), the cell envelope and genome take up 26% and 2.5% of  
836 the cell volume, respectively.

837

838 **Figure S6.** Batch growth and nutrient dynamics numerical model results (blue lines) for a batch  
839 culture of HIMB114, using phosphate as a sole source of phosphorus. (A) Phosphate (Pi) pool  
840 concentration; (B) rate of change of the Pi pool  $\left(\frac{dP}{dt}\right)$  due to uptake by cells; (C) Pi pool turnover  
841 time ( $T_p$ ), with gray horizontal solid line indicating the minimum turnover time of 50 d, and gray  
842 dashed horizontal line showing when the turnover time is one order of magnitude above the

843 minimum (500 d); (D) culture biomass as phosphorus concentration, with actual P-biomass  
844 calculated from cell counts from the culture (circles); (E) phosphate uptake rate dynamics,  
845 assuming phosphate as a sole source of phosphorus. The observed uptake rate value is plotted as  
846 a horizontal dashed gray line near the bottom of the y-axis, measured late on day 7 at 0.004%  
847 total P d<sup>-1</sup>. This intersects the modeled rate on day 11.6, nearly four days following the observed  
848 rate. (F) Similar to panel C, but with Pi pool turnover time in units of years and on a linear scale.  
849 Colored areas indicate time windows for turnover times less than 1 (light blue), 10 (blue), and 50  
850 (purple) years. For all panels, the gray dashed vertical line indicates the time of highest uptake  
851 rate of phosphate, or equivalently the shortest turnover time. This corresponds closely to the  
852 actual timing of the measured Pi uptake experiments from the HIMB114 batch cultures, shown  
853 by the cell density circle closest to the vertical line in panel D.

854

855 **Figure S7.** <sup>3</sup>H-Leucine incorporation by HIMB114 as a function of incubation time.

856

857

858

859

860

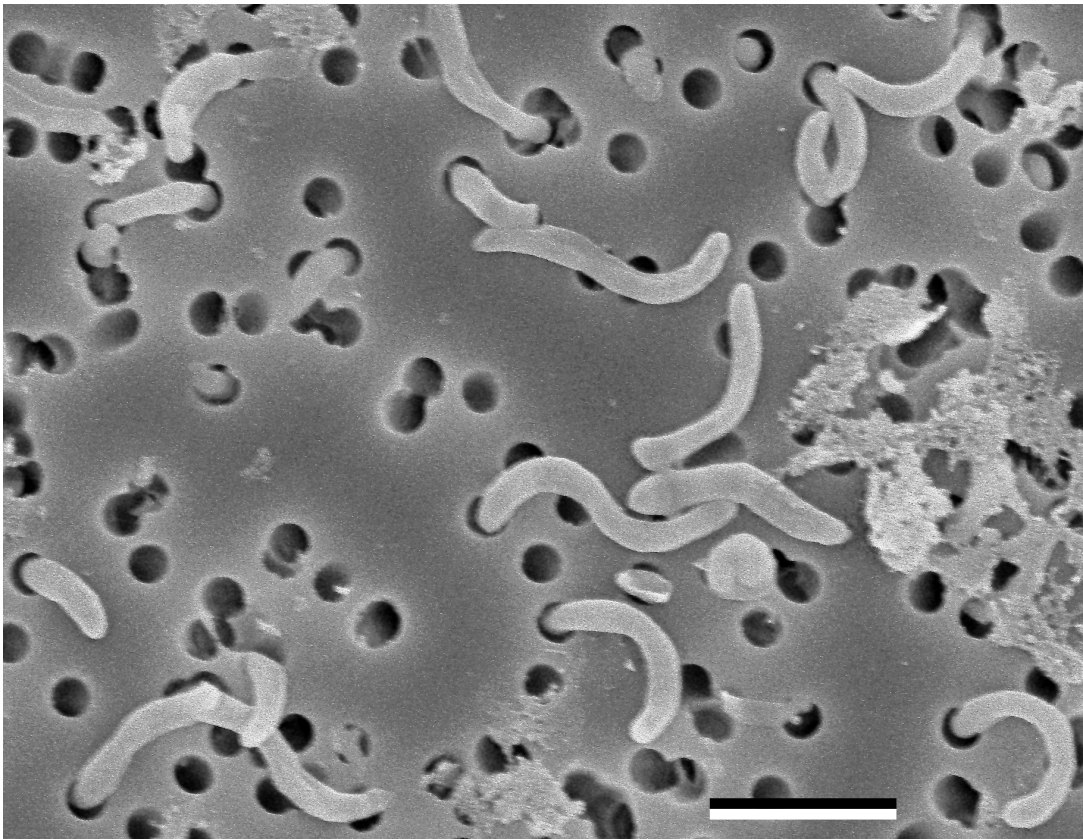

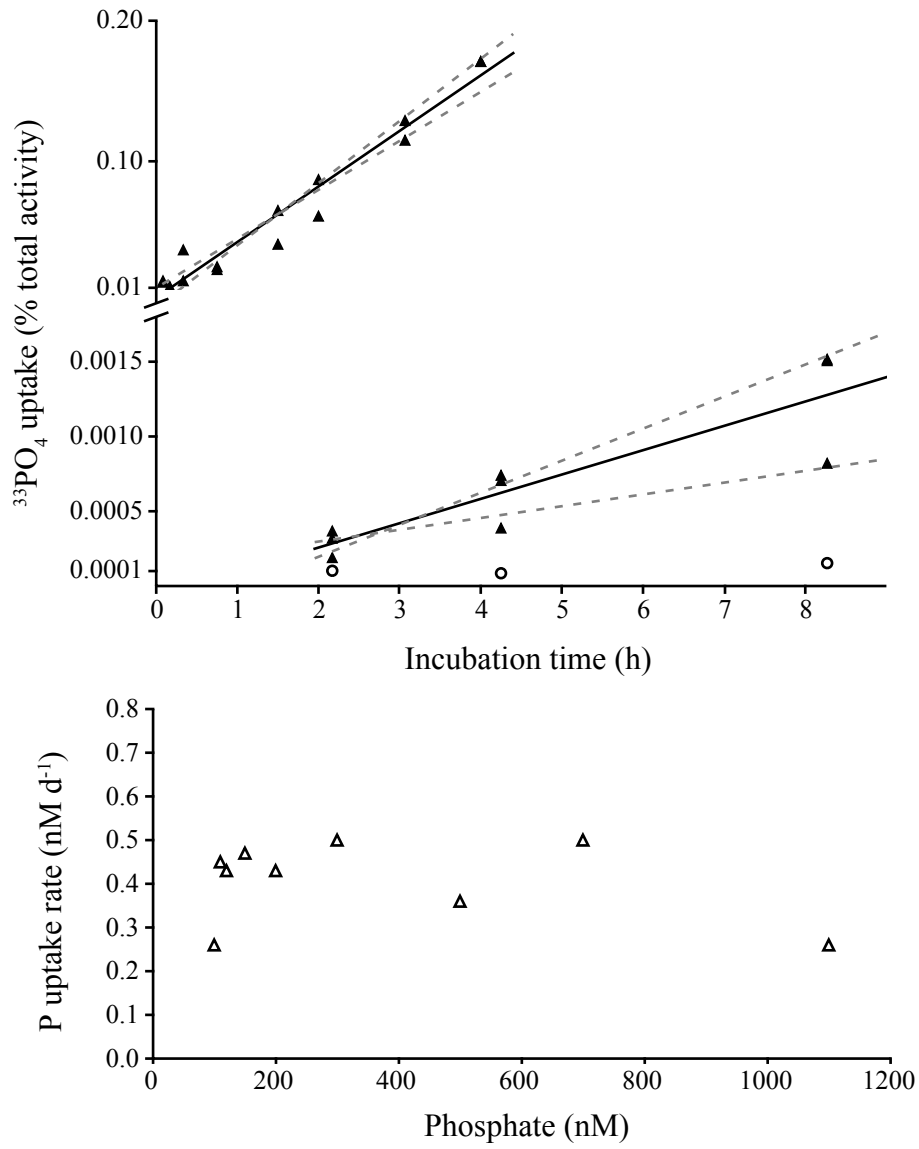

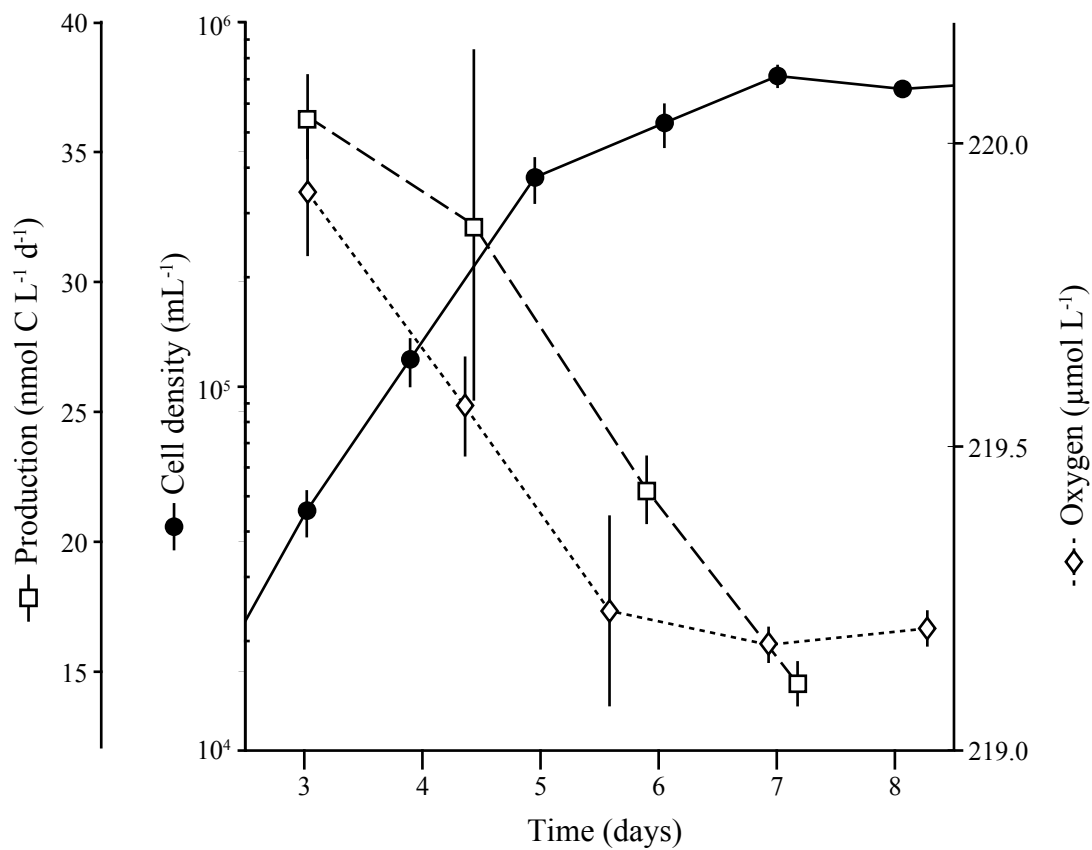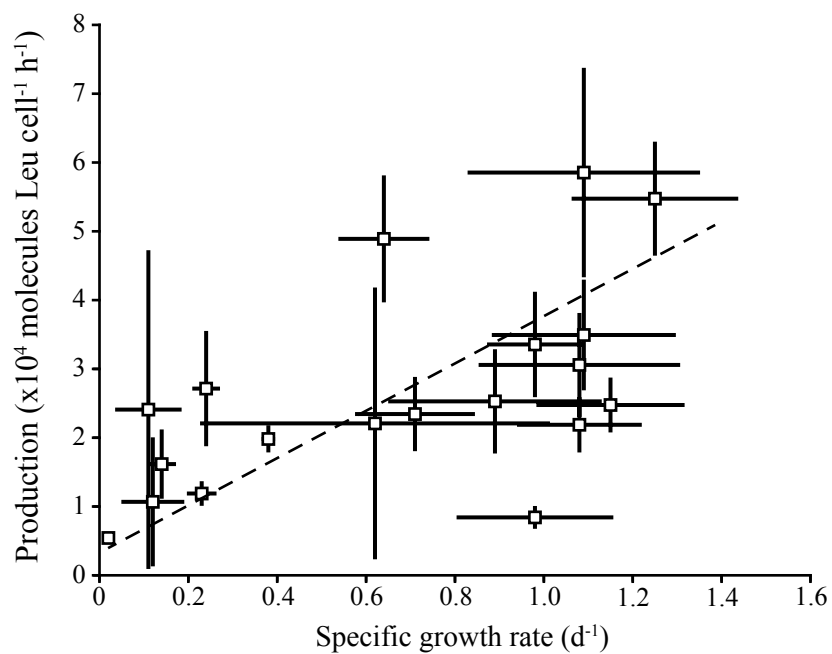

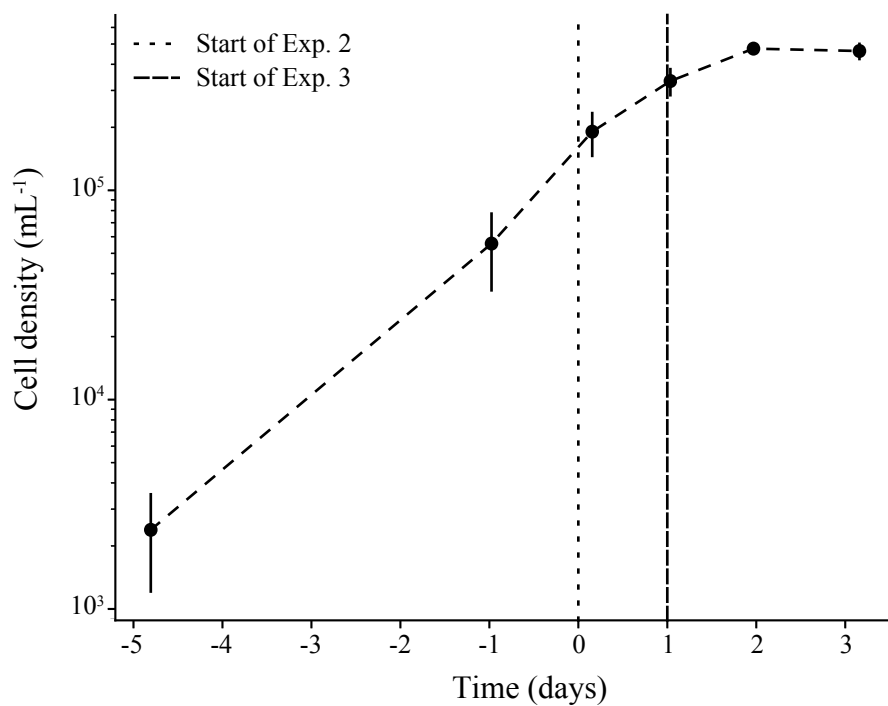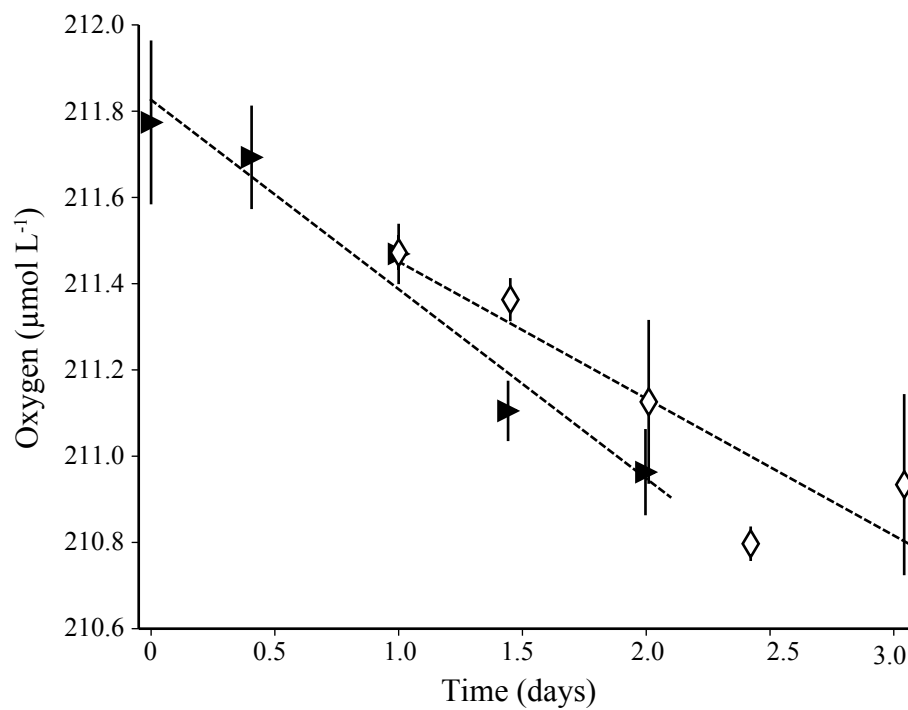

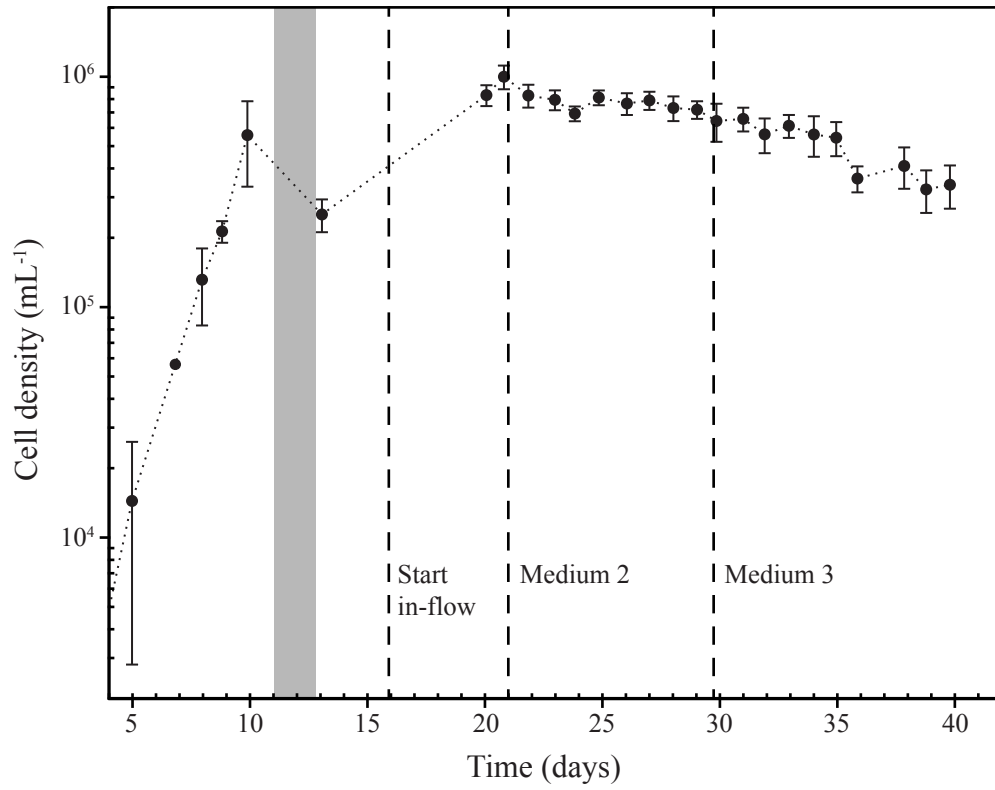



## Supplemental Methods

### Cell enumeration and image analysis

Cell biovolume ( $V$ ) was calculated from cell length ( $L$ ) and width ( $W$ ) using a bulk geometric function for a prolate spheroid,  $V = \frac{\pi}{6}W^2L$ . Although the bulk geometric function for a prolate spheroid has been shown to overestimate volumes for objects with similar shape morphology to HIMB114 by about 50%, it is likely the most appropriate bulk formula to use, and is better than using an equation for a cylinder with hemispherical caps, which can overestimate volumes for these shapes by 100% (Sieracki, Viles, & Webb, 1989).

### Phosphate uptake

Control tests were made for the non-biological adsorption of  $^{33}\text{P}$ -tracer to both Nuclepore PC and Supor PES membranes (Pall Corp.) with and without the high-phosphate pre-saturation step. PC membranes were found to be superior to PES membranes for lowering control background, retaining just 0.0001% and 0.05% of the total  $^{33}\text{P}$  activity with and without the high-phosphate pre-saturation step, respectively. The Supor PES membranes retained significantly more of the  $^{33}\text{P}$ -phosphate radiotracer, 0.07% and 0.34% of the total activity with and without the high-phosphate step, and with much higher variance between replicates than for the PC membranes. Therefore, PC membranes were chosen as the preferred filters for reducing both the background and sample variance for  $^{33}\text{P}$ -phosphate uptake measurements.

### Batch growth and nutrient dynamics model

A numerical model to describe the dynamics of batch culture growth was constructed to provide insights and theoretical comparisons for the measured  $\text{PO}_4^{3-}$  uptake rates and turnover

times under batch growth conditions. The model is cast in units of P concentration, in order to describe the uptake of  $\text{PO}_4^{3-}$  and growth of the culture with the assumption that  $\text{PO}_4^{3-}$  is the sole source of P for the culture.

The prognostic equation for the culture cell density ( $x$ ) is described by a second order logistic equation:

$$\frac{dx}{dt} = \mu \cdot v \cdot x \cdot \left[ 1 - \left( \frac{x}{x_{max}} \right)^n \right]$$

where  $n$  is the exponential constant for logistic growth, which we set to 2 after investigating the growth curves for  $n = 1$  to 4 (an exponent higher than 1 is needed to correctly model the observed, rapid transition from exponential to stationary phase);  $x_{max}$  is the observed maximum cell density for the culture;  $v$  is the rectangular hyperbolic Monod function for phosphate limited growth, which never came into effect here because the phosphate pool never approached, within an order of magnitude, the assumed phosphate half-saturation constant for growth of  $K_{\mu} = 1$  nM P. The growth rate function,  $\mu$ , is used to describe the transition from the lag phase to the exponential maximum growth rate phase, and is also described by a logistic equation:

$$\frac{d\mu}{dt} = \frac{1}{\tau} \cdot \mu \left[ 1 - \left( \frac{\mu}{\mu_{max}} \right) \right]$$

where  $\tau$  is the timescale for the lag phase transition to exponential growth (1 d), and  $\mu_{max}$  is the observed exponential phase growth rate. To convert from cell density to P-based biomass units, the measured P cell quota ( $Q_P$ ) is assumed to be constant throughout the growth curve, and the

growth of cell biomass is directly coupled to the uptake of P from the phosphate pool:

$$\frac{dp}{dt} = -\frac{dx}{dt} \cdot Q_P$$

with observed initial concentrations of  $P$  and  $x$  used to initialize the model. The model was stepped forward with a time step of 30 minutes for 12 days using a simple Newton numerical scheme.

Because of the inherent non-linear dynamics of batch growth conditions, the theoretical nutrient uptake rates and turnover time may be quite dynamic, potentially changing by an order of magnitude on a daily timescale, making the interpretation of a measured rate on any particular day difficult. Results from the model matched reasonably well with the observed growth curve, and also confirmed that the time of maximum  $\text{PO}_4^{3-}$  uptake rates (Fig. S6E) and minimum turnover time (Fig. S6C) occur at the end of the exponential phase of growth (Fig. S6D). This corresponded quite closely to when the  $\text{PO}_4^{3-}$  uptake measurements were measured on this culture (Fig. S6D). The maximum theoretical specific uptake rate calculated by the model was  $2 \times 10^{-2} \text{ d}^{-1}$ , or  $3 \text{ nmol P L}^{-1} \text{ d}^{-1}$ , compared to the observed specific rate of  $4 \times 10^{-5} \text{ d}^{-1}$ , or  $6 \text{ pM P L}^{-1} \text{ d}^{-1}$ , measured very close to this time. The theoretical uptake rate falls off exponentially on either side of the maximum (Fig. S6E). The model also indicates that the minimum turnover time for the  $\text{PO}_4^{3-}$  pool, occurring on day 7.8, should be close to 50 days, again increasing exponentially around the minimum. The actual turnover time measured at the end of day 7 was 70 years (range from 50 to 150), about 500 times the minimum turnover time. Even if the lower estimate of 50 years is used, the timing would need to be off by over 3.5 days to measure a turnover time of that scale (Fig. S6).

Knowing what range of  $\text{PO}_4^{3-}$  turnover times to expect on a theoretical basis is quite difficult in batch cultures because of the non-linear dynamics, for which there is no clearly superior choice of functional parameterization for modeling batch culture growth (Zwietering et al., 1990). This creates a large uncertainty, of likely an order of magnitude, in the modeled uptake rates, which are particularly sensitive to the timing within the growth curve. Nevertheless, the turnover time was measured at what should be quite close to the time in the growth curve that would coincide with the minimum turnover time for  $\text{PO}_4^{3-}$ , and yet the measured turnover times were at least 500 times larger than expected.

### **Bacterial production**

Typically, quadruplicate 1.5 mL sample volumes and duplicate blanks were added into 2 mL microcentrifuge tubes, followed by 2  $\mu\text{L}$  of  $^3\text{H}$ -3,-4,-5-Leucine (106 Ci  $\text{mmol}^{-1}$ ; 5 mCi  $\text{mL}^{-1}$ ; PerkinElmer) to a final concentration of 60 nmol Leu  $\text{L}^{-1}$ , mixed well, and incubated for 2.5 h under the same temperature and light conditions as the original cultures. Blanks were killed with trichloroacetic acid (TCA, 5% final) before the addition of  $^3\text{H}$ -Leu. Incubations were stopped by the addition of TCA (5% final, 4 °C), centrifuged (14,000 rpm at 4 °C for 15 min), rinsed with 1 mL 5% TCA (4 °C), centrifuged again (14,000 rpm at 4 °C for 5 min), then rinsed with 1 mL 80% ethanol (4 °C) and centrifuged (14,000 rpm at 4 °C for 5 min). Pellets were allowed to dry overnight at room temperature in a fume hood before adding 1 mL of scintillation cocktail (UltimaGold LLT; PerkinElmer), vortexed, and allowed to sit for at least four days before making final activity counts (PerkinElmer Tri-Carb Liquid Scintillation counter), as the activity was observed to increase over the first two days after adding cocktail. Activity counts were converted to leucine concentration based on the specific activity of the isotope and

calibrated to a  $^3\text{H}$  standard. Prior to using single 2.5-hr time point incubations, the linearity of  $^3\text{H}$ -Leu incorporation by the HIMB114 culture was tested over 4 h and found to be quite linear over that time period (Fig. S7).

### **Oxygen respiration**

Oxygen concentration measurements were made based on the mass spectrometric determination of the ratio of oxygen to argon. Briefly, the seawater sample was continuously pumped across a permeable membrane under vacuum, allowing dissolved gasses to diffuse across the membrane that were detected by an in-line mass spectrometer. An equilibrated seawater standard was used for calibration, and the oxygen concentration was calculated by the change in the  $\text{O}_2/\text{Ar}$  ratio referenced to the initial, time zero, oxygen concentration. Oxygen respiration rates were then calculated by linear least squares regression of oxygen concentration versus incubation time over two-day periods.

### **Cellular Elemental Analysis**

**Carbon and Nitrogen.** Preliminary tests of filtration methods indicated that filtration by even the lowest of vacuum pressure retained undetectable cells, while filtration by gravity retained at most 50% of cells. This was slightly better than very slow ( $5 \text{ mL min}^{-1}$ ) peristaltic pump filtration, which was comparable to the rate of filtration by gravity. Because of the very slow filtration rates by gravity in combination with the large volumes that needed to be filtered, filtrations were conducted in a  $4^\circ\text{C}$  walk-in cold room in order to stop cellular metabolism, and carried out over a period of 8 days of continuous gravity filtration. Pump speeds were adjusted to keep pace with the gravity filtration rates, which started at  $3.5 \text{ mL min}^{-1}$  and gradually slowed to

2 mL min<sup>-1</sup> by day 5. Once filtration rates slowed to below 1 mL min<sup>-1</sup> (day 8) the filtration was stopped.

For procedural blanks, batch cultures were 0.2 µm-filtered twice to remove all cells (0.2 µm pore-size, 47 mm-diameter Nuclepore PC membrane followed by 0.22 µm pore-size, Sterivex-GP PES membrane) and the filtrate used to construct dissolved carbon and nitrogen blank saturation curves by filtering 0, 1, 2, 5, and 10 L of sterile-filtered media through combusted GF-75 filters. These filters were then analyzed for carbon and nitrogen along with the sample filters (Fig. S3).

**Phosphorus.** Tubes containing sample filters were combusted for 9 h at 450 °C in order to convert organically bound phosphorus to inorganic phosphate, which was then extracted in 10 mL of 0.15 M HCl for 1 h at room temperature. Sub-samples (5 mL) of the acid extract were reacted with 0.5 mL of a molybdate mixed reagent solution to develop the blue phospho-molybdate complex. The molybdate mixed reagent was made by combining 10 mL of 30 g L<sup>-1</sup> ammonium paramolybdate solution, 25 mL of 5N sulfuric acid, 10 mL of 5.4 wt.% ascorbic acid solution, and 5 mL of 1.7 g L<sup>-1</sup> potassium antimony-tartrate solution. After allowing one h for color development, absorbance was measured on a spectrophotometer at 880 nm using a 1 cm path length quartz cell. Phosphorus concentrations were calculated using a phosphate standard curve, with the mean absorbance of the media procedural blanks subtracted from the sample absorbance.

## Supplemental References

Sieracki ME, Viles CL, and Webb KL. 1989. Algorithm to estimate cell biovolume using image analyzed microscopy. *Cytometry* 10:551–557.

Zwietering MH, Jongenburger I, Rombouts FM, Vantriet K. 1990. Modeling of the bacterial-growth curve. *Appl Environ Microbiol* 56:1875–1881.

Table S1. Presence of genes for phosphorus uptake and metabolism in selected publicly available SAR11 genomes sequenced from cultivated strains.

| Strain   | Lineage | Source                       | pstS<br>phosphate<br>transport | phoBU<br>phosphate<br>regulation | phnCDE<br>phosphonate<br>transport | phnAGHI<br>JKLMNX<br>phosphonate<br>metabolism | ppx/ppk<br>polyphosphate<br>metabolism |
|----------|---------|------------------------------|--------------------------------|----------------------------------|------------------------------------|------------------------------------------------|----------------------------------------|
| HIMB114  | IIIa    | Subtropical<br>North Pacific | +                              | +                                | +                                  | phnAX                                          | -                                      |
| HIMB58   | I Ib    | Subtropical<br>North Pacific | +                              | +                                | -                                  | -                                              | -                                      |
| HIMB59   | V       | Subtropical<br>North Pacific | +                              | +                                | +                                  | phnAX                                          | -                                      |
| HIMB5    | Ia      | Subtropical<br>North Pacific | +                              | +                                | -                                  | -                                              | -                                      |
| HTCC7211 | Ia      | Sargasso Sea,<br>Atlantic    | +                              | +                                | +                                  | +                                              | +                                      |
| HTCC9565 | Ia      | Temperate<br>North Pacific   | -                              | phoH                             | -                                  | -                                              | -                                      |
| HTCC1002 | Ia      | Temperate<br>Coastal Pacific | -                              | phoH                             | -                                  | -                                              | -                                      |
| HTCC1062 | Ia      | Temperate<br>Coastal Pacific | +                              | +                                | -                                  | -                                              | -                                      |



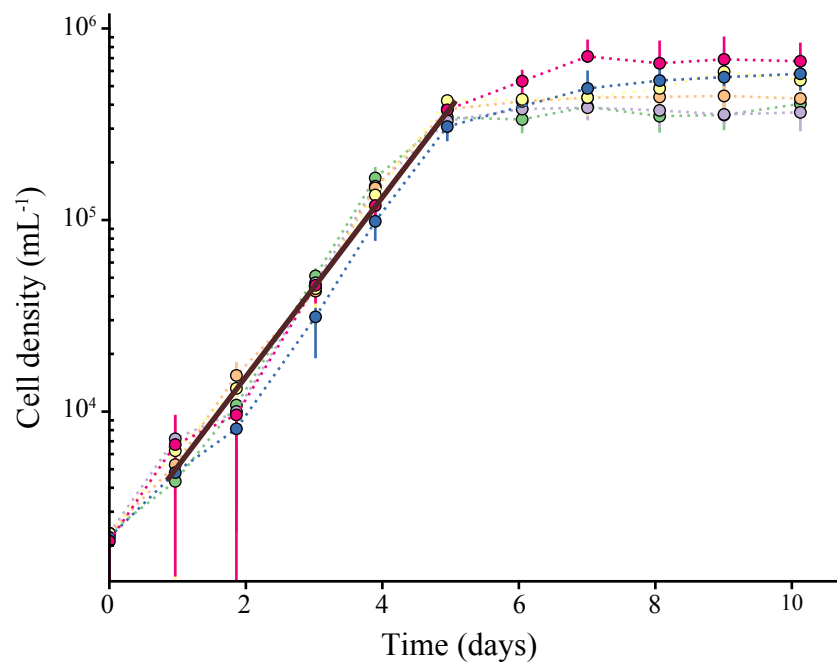

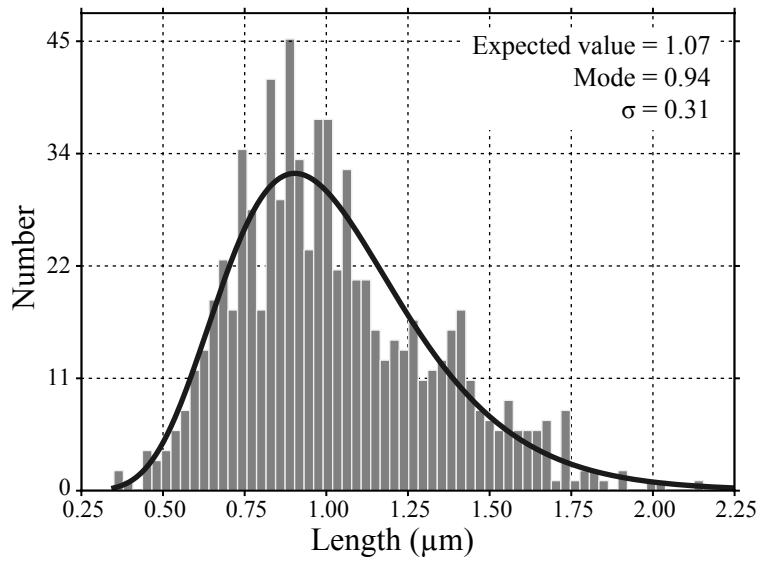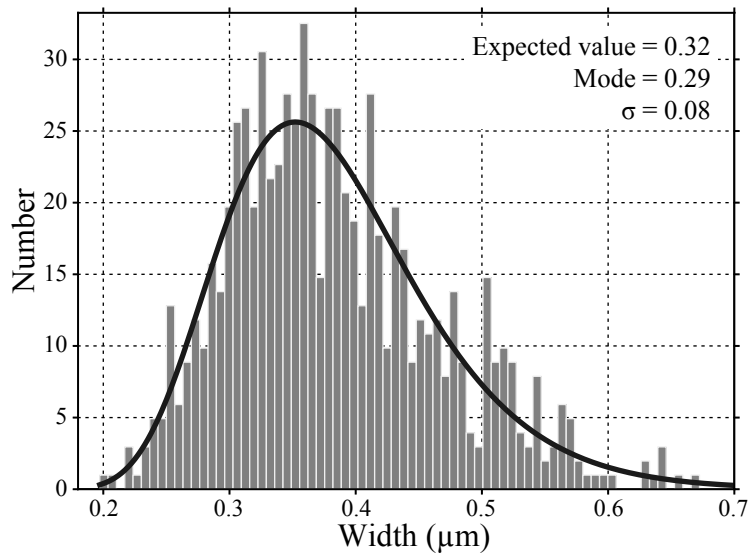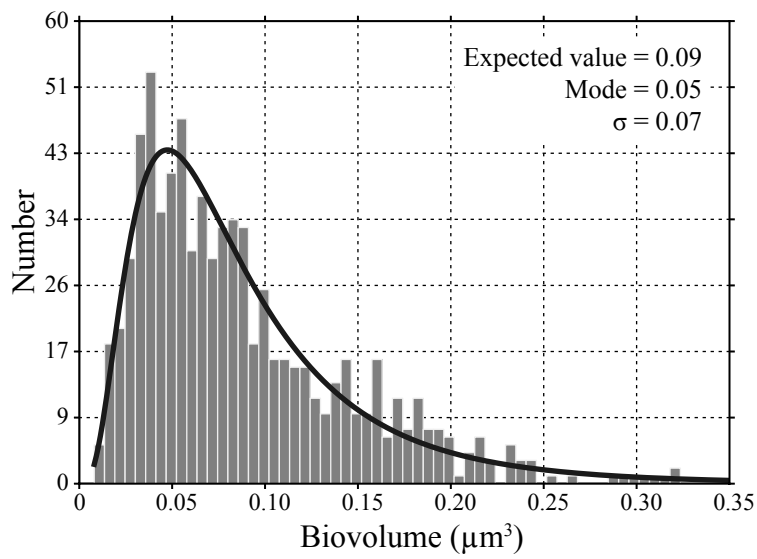

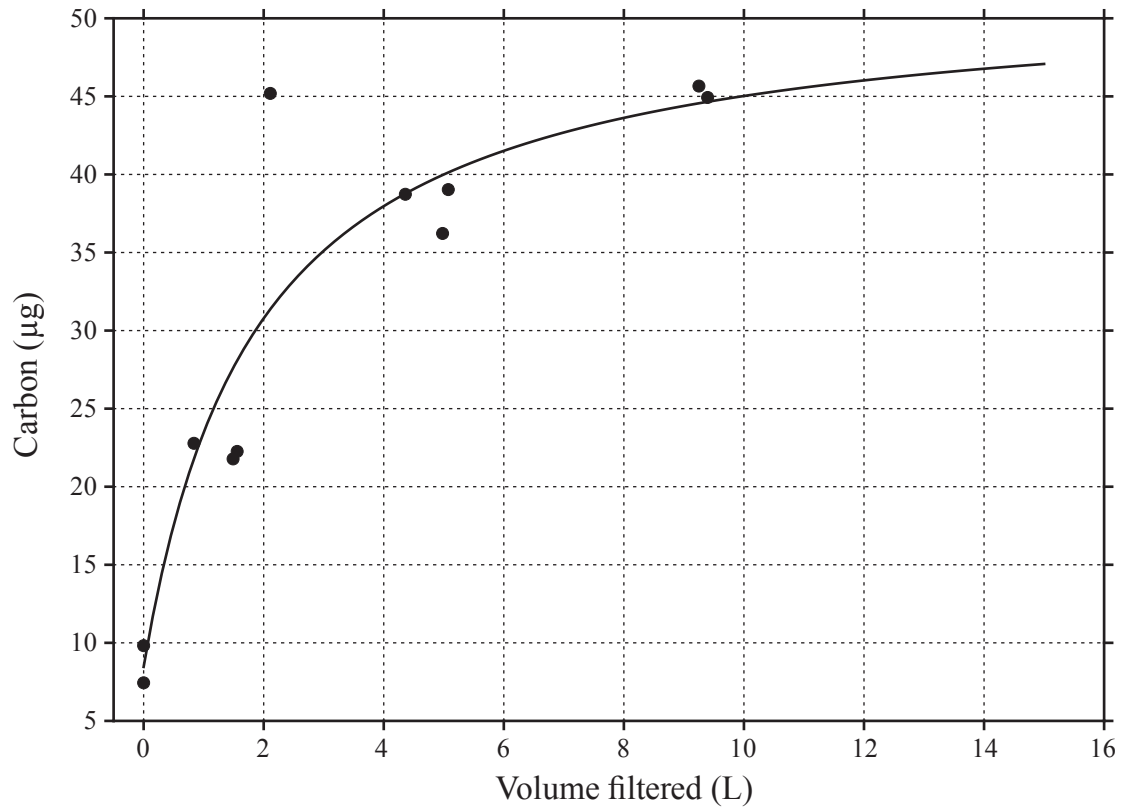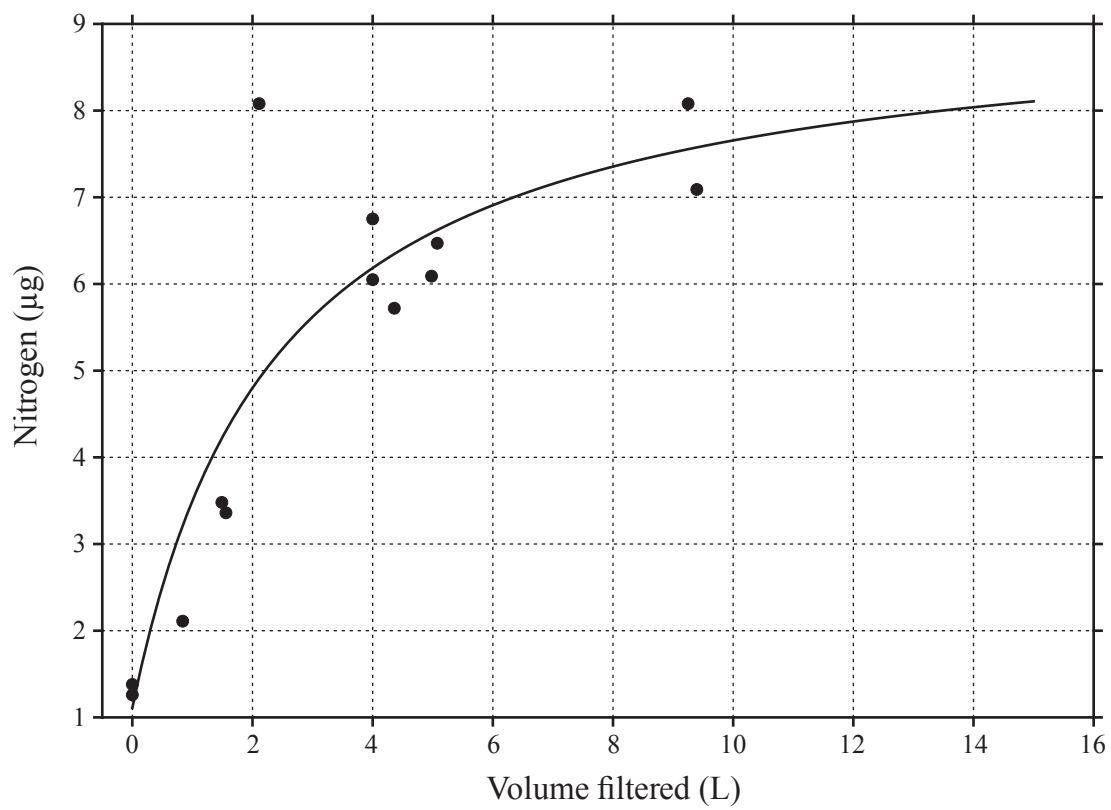

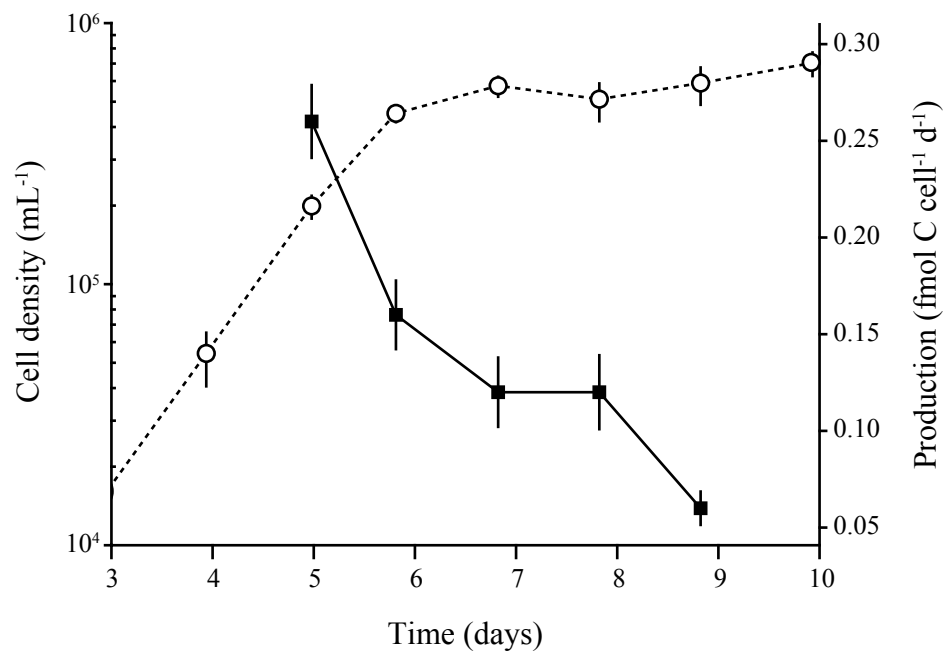

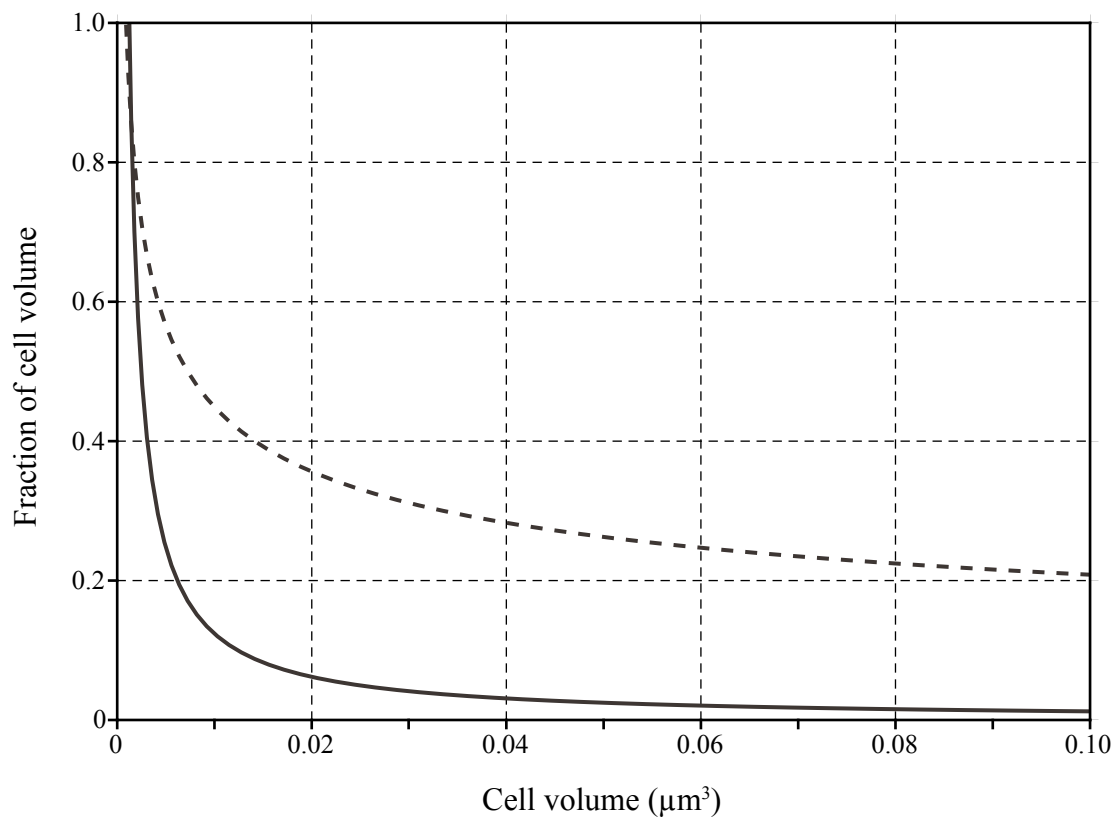

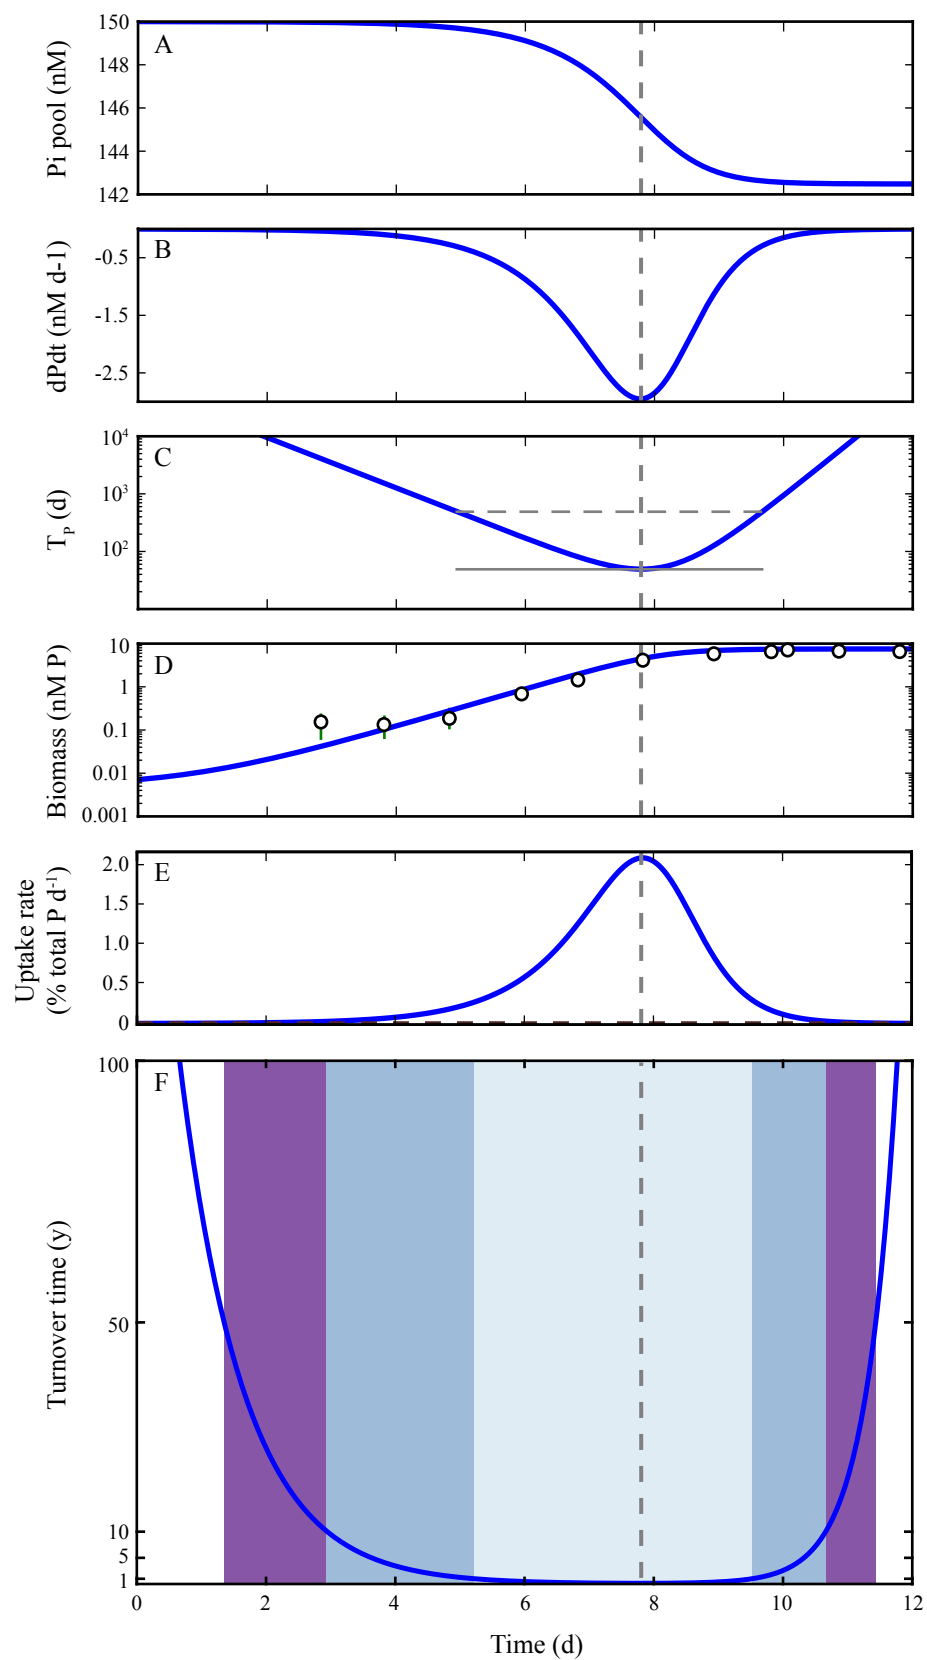

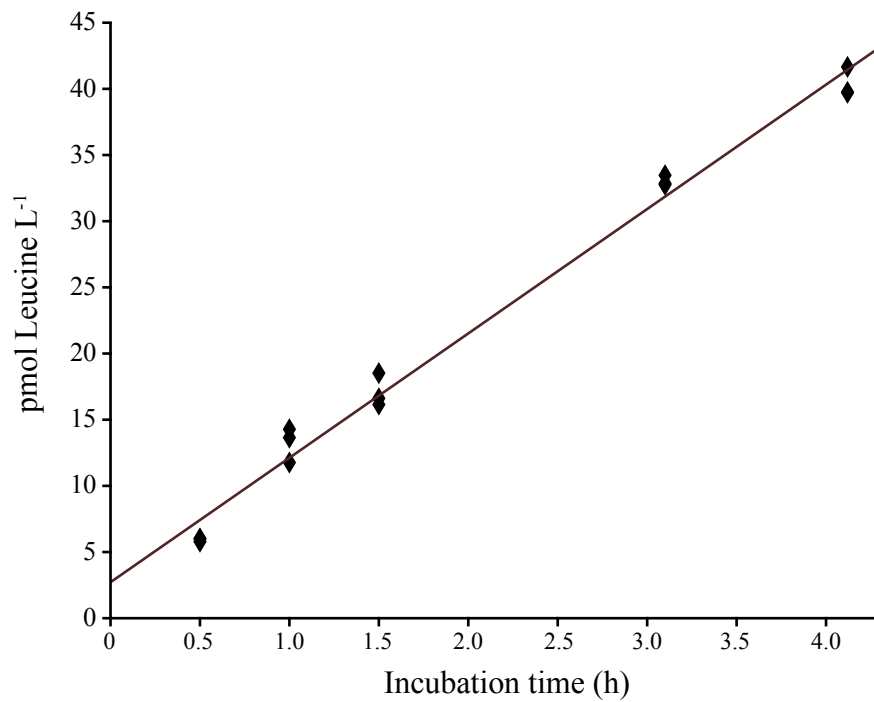

Source: http://biorxiv.org/content/10.1101/421644v1.full.pdf
